# Supplementary material for: The NAD+ precursor NMN activates dSarm to trigger axon degeneration in Drosophila
Source: eLife journal article supplement (doi:10.7554/elife.80245), 2022-12-07
Supplement: fig1-figsupp2-data1 [file elife-80245-fig1-figsupp2-data1-v2.zip]

## Sheet: Sheet1
high band
		PncC	Background	syx	Background	Expression	expression +100				high band	sd
	NMN	104.289	110.634	161.642	273.801	0.0565715	5.65715			NMN	4.8891	0.861962
	Dead	105.89	110.634	168.11	273.801	0.0448856	4.48856			Dead	3.62427	0.780334
	MF II	109.001	110.634	180.702	273.801	0.0175405	1.75405			MF II	1.5159	0.433156
	MF III	109.156	110.634	180.096	273.801	0.0157729	1.57729			MF III	1.67858	0.0885603
	NMN	106.164	110.634	185.344	273.801	0.050533	5.0533
	Dead	107.52	110.634	182.555	273.801	0.0341275	3.41275
	MF II	109.628	110.649	174.647	275.147	0.0101592	1.01592
	MF III	108.706	110.649	163.569	275.147	0.0174138	1.74138
	NMN	106.875	110.649	179.768	275.147	0.0395685	3.95685
	Dead	107.709	110.649	176.207	275.147	0.029715	2.9715
	MF II	109.059	110.649	185.707	275.147	0.0177773	1.77773
	MF III	108.762	110.649	165.251	275.147	0.0171708	1.71708
	MF II	109.417	110.649	179.675	275.147	0.0129043	1.29043
	MF III	109.069	110.649	165.668	275.147	0.014432	1.4432
low band											low band	sd
		PncC	Background	syx	Background	Expression				NMN	5.16034	1.01702
	NMN	103.838	110.634	161.642	273.801	0.0605926	6.05926			Dead	3.97659	0.823862
	Dead	105.437	110.634	168.11	273.801	0.0491716	4.91716			MF II	1.00257	0.267387
	MF II	109.597	110.634	180.702	273.801	0.0111387	1.11387			MF III	1.05464	0.0452796
	MF III	109.647	110.634	180.096	273.801	0.0105331	1.05331
	NMN	105.888	110.634	185.344	273.801	0.0536532	5.36532
	Dead	107.322	110.634	182.555	273.801	0.0362975	3.62975
	MF II	109.948	110.649	174.647	275.147	0.00697512	0.697512
	MF III	109.421	110.649	163.569	275.147	0.0110058	1.10058
	NMN	106.78	110.649	179.768	275.147	0.0405645	4.05645
	Dead	107.302	110.649	176.207	275.147	0.0338286	3.38286
	MF II	109.579	110.649	185.707	275.147	0.0119633	1.19633
	MF III	109.539	110.649	165.251	275.147	0.0101005	1.01005
	MF II	109.818	110.649	179.675	275.147	0.00870412	0.870412
	MF III	109.724	110.649	165.668	275.147	0.00844911	0.844911
