# Supplementary material for: The NAD+ precursor NMN activates dSarm to trigger axon degeneration in Drosophila
Source: eLife journal article supplement (doi:10.7554/elife.80245), 2022-12-07
Supplement: fig2-data1 [file 2B.xlsx]

## Sheet: Metabolic analyses Figure 2B
Metabolic analyses Figure 2B
µmol/L
BRAINS				Nicotinamide mononucleotide (NMN)	Nicotinic acid mononucleotide (NaMN)	Nicotinic acid adenine dinucleotide (NaAD)	NAD	Nicotinamide	Nicotinic acid	Nicotinamide Riboside (NR)	Nicotinate Riboside (NaR)	ADPR	cADPR	3-OH-Kynurenine	Kynurenine	Tryptophan	3-OH-Anthranilic acid	Xanthurenic acid	Kynurenic acid
Sample_ID	Volume Extraction Metabolites (µL)	Volume Extraction Proteins (µL)	Protein Conc. (µg/mL)	Calc. Conc. (µM)	Calc. Conc. (µM)	Calc. Conc. (µM)	Calc. Conc. (µM)	Calc. Conc. (µM)	Calc. Conc. (µM)	Calc. Conc. (µM)	Calc. Conc. (µM)	Calc. Conc. (µM)	Calc. Conc. (µM)	Calc. Conc. (µM)	Calc. Conc. (µM)	Calc. Conc. (µM)	Calc. Conc. (µM)	Calc. Conc. (µM)	Calc. Conc. (µM)
LN_NAD_052021_actin nmn 1_1	150	750	753	0.211463	0.183839	0.0991738	7.67606	0.0305637	0.138569	0.0908044	0.0142639	0.150338	0.756944	16.0696	0.144514	1.59901	0.0583746	16.6417	0.448854
LN_NAD_052022_actin nmn 2_2	150	750	712	0.218547	0.176236	0.0860594	9.00867	0.018262	0.203802	0.0831643	0.021579	0.175106	0.885564	21.6201	0.324885	2.2967	0.0864146	12.6922	0.447565
LN_NAD_052023_actin nmn 3_3	150	750	679	0.14738	0.200461	0.114891	11.2889	0.00900502	0.163612	0.0916157	0.0175143	0.168986	1.15839	30.4528	0.758672	2.70955	0.0685849	15.0188	0.640817
LN_NAD_052024_actin nmn 4_4	150	750	837.5	0.145319	0.164617	0.0960341	8.98202	0.0198572	0.108457	0.100654	0.0129772	0.305358	0.860712	32.1055	0.413544	2.71201	0.0744968	13.8339	0.905018
LN_NAD_052025_actin dead 1_5	150	750	1151.5	1.0334	0.0192612	0.0234501	11.4404	0.0150047	0.107362	0.109044	0.00269409	0.28316	0.913737	29.3275	0.372135	2.5661	0.0943842	12.6931	0.322773
LN_NAD_052026_actin dead 2_6	150	750	799	0.943938	0.01228	0.014822	7.58332	0.0125417	0.137349	0.116271	0.00198279	0.121467	1.26017	23.728	0.131007	1.75288	0.0433918	15.8921	0.289551
LN_NAD_052027_actin dead 3_7	150	750	997.5	1.16524	0.017546	0.0136153	9.01378	0.021274	0.259612	0.102174	0.00213893	0.273645	2.0026	28.0741	0.309653	2.27698	0.0825543	16.1614	0.537755
LN_NAD_052028_actin dead 4_8	150	750	737	1.29178	0.00895278	0.0190496	8.17158	0.0277758	0.185258	0.162734	0.00335408	0.182676	1.08789	25.5776	0.189617	2.006	0.0568129	16.5585	0.505826
LN_NAD_052029_actin ctr 1_9	150	750	482.5	0.97	0.0130798	0.0235327	10.0785	0.0087965	0.148997	0.0909838	0.00230844	0.0938779	1.01882	19.8218	0.266586	2.59428	0.0589594	7.40465	0.0785862
LN_NAD_052030_actin ctr 2_10	150	750	375	0.909285	0.01676	0.0163887	10.6115	0.013611	0.194796	0.0727997	0.00264963	0.074541	1.08094	13.8241	0.190586	2.10955	0.0890828	7.34398	0.0652149
LN_NAD_052031_actin ctr 3_11	150	750	200.5	0.892481	0.0120538	0.0111639	7.88207	N.D	0.118659	0.0680651	0.00137249	0.042575	0.45062	8.15372	0.115843	1.41061	0.0639103	5.96583	0.0374297
LN_NAD_052032_actin ctr 4_12	150	750	378.5	0.80244	0.0132122	0.0199948	9.66183	0.0089197	0.0796201	0.0921703	0.00213163	0.126719	0.40349	12.2243	0.151423	1.6468	0.0657389	6.50815	0.0590335
LN_NAD_052033_dead ctr 1_13	150	750	853.5	0.944212	0.0175081	0.0297412	13.0071	0.0214139	0.0666631	0.0840949	0.00272741	0.127616	0.115509	2.66014	0.587833	2.10261	0.0920448	3.12748	0.0446664
LN_NAD_052034_dead ctr 2_14	150	750	424.5	0.689172	0.0131311	0.0189229	11.0255	0.0102643	0.0365843	0.0830648	0.00218306	0.0789868	0.0627619	2.51801	0.176752	1.85611	0.0786387	1.88148	0.0241902
LN_NAD_052035_dead ctr 3_15	150	750	733.5	1.07597	0.0124355	0.0240318	10.8512	0.0215465	0.113762	0.0815312	0.00243092	0.0917852	0.234222	1.68393	0.1585	1.58011	0.0692004	2.38807	0.0268354
LN_NAD_052036_dead ctr 4_16	150	750	482.5	0.465269	0.0101756	0.018554	8.94761	0.0165713	0.0278931	0.0632548	0.00207796	0.0702269	0.0774589	3.15428	0.399678	1.59741	0.0524911	2.01791	0.0373223
LN_NAD_052037_nmn ctr 1_17	150	750	606	0.7911	0.0197533	0.0205798	11.1163	0.0177888	0.0729785	0.083357	0.00393288	0.0782026	0.129789	2.07575	0.22902	1.71562	0.0719252	2.537	0.0397036
LN_NAD_052038_nmn ctr 2_18	150	750	544	0.984943	0.0200277	0.0279008	12.139	0.00944451	0.0805492	0.0799522	0.00406373	0.0830472	0.149784	2.10582	0.277241	1.92734	0.0716519	2.33166	0.040353
LN_NAD_052039_nmn ctr 3_19	150	750	684	1.09255	0.0232805	0.0255703	10.6255	0.0125699	0.105506	0.0753913	0.00396102	0.0783441	0.240263	2.67717	0.331194	2.35456	0.0822754	2.96013	0.044847
LN_NAD_052040_nmn ctr 4_20	150	750	728.5	0.804955	0.0279431	0.0275982	12.3567	0.0183922	0.142024	0.0741009	0.00388094	0.0849746	0.316274	2.43109	0.38405	2.46054	0.0827762	1.90004	0.0544975
LN_NAD_052041_elav nmn1_21	150	750	903.5	0.457365	0.123255	0.051497	9.57777	0.0377427	0.161601	0.0905404	0.0064496	0.225707	0.970773	42.9816	0.234121	2.77873	0.115237	23.0255	0.596579
LN_NAD_052042_elav nmn2_22	150	750	1144	0.492189	0.127358	0.0542351	9.12618	0.022185	0.100039	0.114668	0.00818384	0.237558	1.0485	50.6498	0.223871	2.93229	0.121958	22.4289	0.741783
LN_NAD_052043_elav nmn3_23	150	750	1149.5	0.411111	0.121515	0.0566754	7.68486	0.0306443	0.174183	0.0965532	0.00717716	0.19606	1.92104	60.772	0.436314	3.33521	0.107103	22.9806	0.762216
LN_NAD_052044_elav nmn4_24	150	750	1074	0.610228	0.0570822	0.0513777	10.6767	0.0135352	0.047236	0.104533	0.00510682	0.195621	0.217224	38.9764	0.223501	2.45143	0.144006	23.5619	0.838961
LN_NAD_052045_elav ctr 1_25	150	750	1045	0.751328	0.014057	0.0165751	8.3954	0.0252197	0.0491037	0.152977	0.004225	0.167058	0.244449	46.3186	0.572908	3.18804	0.0938899	21.2975	0.881152
LN_NAD_052046_elav ctr 2_26	150	750	1174	0.740774	0.0148075	0.0181678	9.0409	0.0169601	0.0813582	0.136127	0.00295507	0.197268	0.717911	44.6407	0.414921	2.92672	0.0928974	20.6212	0.909495
LN_NAD_052047_elav ctr 3_27	150	750	919	0.690615	0.0124985	0.0117953	8.23954	0.00869258	0.0513962	0.134678	0.00322472	0.16337	0.246513	39.4512	0.468254	2.73159	0.0782018	19.5585	0.858525
LN_NAD_052048_elav ctr 4_28	150	750	1302	0.57583	0.0115087	0.0178654	9.07015	0.0171381	0.0521754	0.138354	0.00299581	0.1716	0.277323	48.461	0.69722	3.48225	0.112849	19.2547	0.865694
LN_NAD_052049_elav repo ctr 1_29	150	750	938	0.716456	0.0118414	0.0192158	8.15079	0.0196038	0.0392275	0.194306	0.00222934	0.288461	0.306438	53.5865	0.501349	3.13455	0.093501	26.0304	2.44342
LN_NAD_052050_elav repo ctr 2_30	150	750	870.5	1.01406	0.0120109	0.0175914	7.85862	0.0152169	0.119613	0.122455	0.00264732	0.198246	0.969155	44.623	0.441769	2.90273	0.0718573	19.3558	0.999568
LN_NAD_052051_elav repo ctr 3_31	150	750	1142	0.821103	0.0141498	0.0150435	9.26809	0.0163764	0.145799	0.150645	0.00190565	0.17368	0.850855	42.5185	0.427302	2.72995	0.105674	21.0328	1.92165
LN_NAD_052052_elav repo ctr 4_32	150	750	1577	0.759623	0.0156677	0.0157339	10.5528	0.0121951	0.0460552	0.125681	0.00223419	0.139887	0.183809	33.9699	0.485808	2.52235	0.113628	20.5076	1.24096
LN_NAD_052053_Repro ctr 1_33	150	750	1139.5	0.718637	0.00892814	0.0103748	8.29592	0.0175354	0.163462	0.0865636	0.00188203	0.166527	0.814428	17.0374	0.467995	1.90283	0.0556849	16.6918	0.465007
LN_NAD_052054_Repro ctr 2_34	150	750	1186	1.30175	0.010078	0.013382	9.29129	0.0114478	0.235967	0.107376	0.00210988	0.156896	1.4833	19.6991	0.342241	2.00269	0.0472062	16.6009	0.392629
LN_NAD_052055_Repro ctr 3_35	150	750	749	0.592288	0.0102894	0.0171583	7.51173	0.019608	0.0375931	0.0930126	0.00214575	0.211093	0.232843	19.5723	0.463402	1.80813	0.070795	15.7101	0.715962
LN_NAD_052056_Repro ctr 4_36	150	750	1076.5	0.70784	0.0124311	0.0147785	9.97829	0.0173914	0.0704056	0.11937	0.00232541	0.20928	0.169546	20.4548	0.306327	2.00843	0.0903325	18.5965	0.541469
LN_NAD_052057_repo nmn 1_37	150	750	1161.5	0.707046	0.0481993	0.0296721	9.0803	0.0203061	0.0319212	0.131504	0.00328324	0.246735	0.179142	24.4665	0.276913	2.19626	0.0685816	19.0238	0.923275
LN_NAD_052058_repo nmn 2_38	150	750	1281	0.608351	0.0567859	0.0292691	7.85022	0.00762021	0.0907381	0.132299	0.00415065	0.255753	0.110141	22.943	0.313643	2.02273	0.0576077	19.5705	1.50412
LN_NAD_052059_repo nmn 3_39	150	750	1325	0.587962	0.0820386	0.0290645	8.30313	0.0162329	0.0460051	0.120199	0.00376481	0.234614	0.258567	21.1159	0.330385	2.20037	0.0777471	20.8448	1.42174
LN_NAD_052060_repo nmn 4_40	150	750	1173.5	0.523557	0.0481002	0.0332357	7.76576	0.0183311	0.0296078	0.159858	0.00461643	0.215319	0.142562	30.0174	0.390996	2.81027	0.0680823	21.3923	1.12997
LN_NAD_052061_elav repo nmn 1_41	150	750	1374.5	0.354451	0.0543875	0.0558413	8.90407	0.0201147	0.0396554	0.143667	0.00514798	0.219407	0.147079	43.1566	0.47041	2.57165	0.0880477	25.9756	1.52251
LN_NAD_052062_elav repo nmn 2_42	150	750	1180	0.458043	0.05733	0.0832154	10.5946	0.0192297	0.0426241	0.232987	0.00881007	0.308534	0.112143	50.9922	0.482106	3.07359	0.129466	28.2879	2.55277
LN_NAD_052063_elav repo nmn 3_43	150	750	1273	0.377327	0.0684351	0.078766	9.13259	0.0212652	0.0454339	0.225138	0.00753779	0.321773	0.460966	64.3452	0.628194	3.42129	0.108617	28.1787	2.77042
LN_NAD_052064_elav repo nmn 4_44	150	750	964	0.3298	0.0681393	0.0718374	7.85569	0.0143653	0.103425	0.162896	0.00574875	0.270712	1.54699	59.0187	0.568151	3.25517	0.10137	23.0876	2.41069
nmol/mg of proteins
BRAINS				Nicotinamide mononucleotide (NMN)	Nicotinic acid mononucleotide (NaMN)	Nicotinic acid adenine dinucleotide (NaAD)	NAD	Nicotinamide	Nicotinic acid	Nicotinamide Riboside (NR)	Nicotinate Riboside (NaR)	ADPR	cADPR	3-OH-Kynurenine	Kynurenine	Tryptophan	3-OH-Anthranilic acid	Xanthurenic acid	Kynurenic acid
Sample_ID	Volume Extraction Metabolites (µL)	Volume Extraction Proteins (µL)	Protein Conc. (µg/mL)	nmol/mg of proteins	nmol/mg of proteins	nmol/mg of proteins	nmol/mg of proteins	nmol/mg of proteins	nmol/mg of proteins	nmol/mg of proteins	nmol/mg of proteins	nmol/mg of proteins	nmol/mg of proteins	nmol/mg of proteins	nmol/mg of proteins	nmol/mg of proteins	nmol/mg of proteins	nmol/mg of proteins	nmol/mg of proteins
LN_NAD_052021_actin nmn 1_1	150	750	753	0.0561655	0.0488285	0.026341	2.0388	0.00811784	0.0368045	0.024118	0.00378854	0.0399304	0.201047	4.26817	0.0383836	0.424705	0.0155045	4.42011	0.119218
LN_NAD_052022_actin nmn 2_2	150	750	712	0.0613897	0.0495045	0.024174	2.53053	0.00512977	0.0572478	0.0233607	0.00606151	0.0491872	0.248754	6.07305	0.09126	0.64514	0.0242738	3.56524	0.12572
LN_NAD_052023_actin nmn 3_3	150	750	679	0.0434109	0.059046	0.0338413	3.32514	0.00265244	0.0481919	0.0269855	0.00515885	0.049775	0.341206	8.96988	0.223467	0.7981	0.0202017	4.4238	0.188753
LN_NAD_052024_actin nmn 4_4	150	750	837.5	0.0347031	0.0393115	0.0229335	2.14496	0.00474203	0.0259002	0.0240367	0.00309903	0.0729213	0.205543	7.66698	0.0987569	0.647644	0.0177903	3.30361	0.216124
LN_NAD_052025_actin dead 1_5	150	750	1151.5	0.179487	0.00334541	0.00407297	1.98704	0.00260611	0.0186473	0.0189395	0.000467926	0.0491811	0.158704	5.0938	0.0646348	0.445696	0.0163933	2.20462	0.0560613
LN_NAD_052026_actin dead 2_6	150	750	799	0.23628	0.00307383	0.00371015	1.8982	0.00313935	0.0343801	0.0291042	0.000496319	0.0304049	0.315437	5.93941	0.0327927	0.438769	0.0108615	3.97801	0.0724784
LN_NAD_052027_actin dead 3_7	150	750	997.5	0.233632	0.003518	0.00272988	1.80727	0.00426546	0.0520526	0.0204859	0.000428858	0.0548663	0.401524	5.62889	0.0620858	0.456537	0.0165522	3.24038	0.107821
LN_NAD_052028_actin dead 4_8	150	750	737	0.35055	0.00242952	0.00516949	2.21752	0.00753753	0.0502735	0.0441611	0.000910199	0.0495728	0.295222	6.94101	0.0514564	0.54437	0.0154173	4.49349	0.137266
LN_NAD_052029_actin ctr 1_9	150	750	482.5	0.402073	0.0054217	0.0097545	4.17762	0.00364622	0.0617603	0.0377135	0.000956867	0.0389131	0.422308	8.21631	0.110502	1.07535	0.0244391	3.06929	0.0325746
LN_NAD_052030_actin ctr 2_10	150	750	375	0.484952	0.00893866	0.00874067	5.65946	0.00725922	0.103891	0.0388265	0.00141314	0.0397552	0.576504	7.37287	0.101646	1.12509	0.0475108	3.91679	0.0347813
LN_NAD_052031_actin ctr 3_11	150	750	200.5	0.890255	0.0120238	0.0111361	7.86242	N.D	0.118363	0.0678954	0.00136907	0.0424689	0.449496	8.13338	0.115554	1.40709	0.0637509	5.95095	0.0373363
LN_NAD_052032_actin ctr 4_12	150	750	378.5	0.42401	0.00698136	0.0105653	5.10533	0.00471318	0.0420714	0.0487029	0.00112636	0.0669583	0.213205	6.45932	0.0800119	0.870171	0.0347365	3.43892	0.0311934
LN_NAD_052033_dead ctr 1_13	150	750	853.5	0.221256	0.00410267	0.00696923	3.04795	0.00501791	0.0156211	0.0197059	0.000639111	0.0299043	0.027067	0.623349	0.137746	0.492704	0.0215688	0.73286	0.0104666
LN_NAD_052034_dead ctr 2_14	150	750	424.5	0.324698	0.00618662	0.00891538	5.19457	0.00483594	0.0172364	0.0391354	0.00102853	0.037214	0.0295698	1.18634	0.0832754	0.874493	0.03705	0.886446	0.0113971
LN_NAD_052035_dead ctr 3_15	150	750	733.5	0.293381	0.00339072	0.00655265	2.95875	0.00587499	0.0310191	0.0222307	0.000662827	0.0250266	0.0638642	0.459151	0.0432175	0.430842	0.0188685	0.651145	0.00731709
LN_NAD_052036_dead ctr 4_16	150	750	482.5	0.192858	0.00421785	0.00769078	3.70885	0.00686894	0.0115619	0.0262196	0.000861331	0.0291096	0.0321073	1.30747	0.16567	0.662137	0.021758	0.836437	0.0154704
LN_NAD_052037_nmn ctr 1_17	150	750	606	0.261089	0.00651923	0.006792	3.66876	0.0058709	0.0240853	0.0275106	0.00129798	0.0258094	0.0428348	0.685065	0.0755843	0.566212	0.0237377	0.837294	0.0131035
LN_NAD_052038_nmn ctr 2_18	150	750	544	0.362111	0.00736312	0.0102576	4.46287	0.00347225	0.0296137	0.0293942	0.00149402	0.0305321	0.0550675	0.774199	0.101927	0.70858	0.0263426	0.85723	0.0148356
LN_NAD_052039_nmn ctr 3_19	150	750	684	0.319459	0.00680717	0.00747669	3.10687	0.00367541	0.0308498	0.0220442	0.00115819	0.0229076	0.0702524	0.7828	0.0968404	0.688468	0.0240571	0.865536	0.0131132
LN_NAD_052040_nmn ctr 4_20	150	750	728.5	0.22099	0.00767142	0.00757672	3.39237	0.00504934	0.0389907	0.0203434	0.00106546	0.0233286	0.0868289	0.667423	0.105436	0.675507	0.0227251	0.521631	0.0149616
LN_NAD_052041_elav nmn1_21	150	750	903.5	0.101243	0.0272839	0.0113994	2.12015	0.00835477	0.0357722	0.0200422	0.00142769	0.0499628	0.214892	9.51447	0.0518253	0.615103	0.025509	5.09695	0.13206
LN_NAD_052042_elav nmn2_22	150	750	1144	0.0860469	0.0222654	0.00948166	1.59549	0.0038785	0.0174893	0.0200469	0.00143074	0.0415311	0.183304	8.85486	0.0391383	0.512637	0.0213213	3.92113	0.129682
LN_NAD_052043_elav nmn3_23	150	750	1149.5	0.0715287	0.0211422	0.00986087	1.33708	0.00533177	0.0303058	0.0167992	0.00124874	0.0341122	0.33424	10.5736	0.0759138	0.58029	0.0186348	3.99836	0.132617
LN_NAD_052044_elav nmn4_24	150	750	1074	0.113637	0.0106298	0.00956754	1.9882	0.00252052	0.00879628	0.019466	0.00095099	0.0364285	0.0404513	7.25817	0.0416204	0.456504	0.0268167	4.38768	0.156231
LN_NAD_052045_elav ctr 1_25	150	750	1045	0.143795	0.00269034	0.00317227	1.60677	0.00482674	0.00939783	0.029278	0.000808612	0.0319729	0.0467845	8.8648	0.109647	0.610151	0.0179694	4.07608	0.168641
LN_NAD_052046_elav ctr 2_26	150	750	1174	0.126197	0.00252257	0.00309503	1.54019	0.00288929	0.01386	0.0231903	0.00050342	0.0336061	0.122302	7.6049	0.0706851	0.49859	0.0158258	3.51298	0.154939
LN_NAD_052047_elav ctr 3_27	150	750	919	0.150297	0.00272002	0.00256698	1.79315	0.00189175	0.0111852	0.0293096	0.000701788	0.0355539	0.0536481	8.58569	0.101905	0.59447	0.0170189	4.25648	0.186839
LN_NAD_052048_elav ctr 4_28	150	750	1302	0.0884531	0.00176785	0.0027443	1.39326	0.00263258	0.00801465	0.0212525	0.000460186	0.0263594	0.0425996	7.44409	0.1071	0.534908	0.0173347	2.95771	0.132979
LN_NAD_052049_elav repo ctr 1_29	150	750	938	0.152762	0.00252482	0.00409718	1.73791	0.00417992	0.00836408	0.0414297	0.000475339	0.0615055	0.0653386	11.4257	0.106897	0.668347	0.0199363	5.55019	0.520984
LN_NAD_052050_elav repo ctr 2_30	150	750	870.5	0.232984	0.00275955	0.00404168	1.80554	0.00349614	0.0274814	0.0281345	0.000608229	0.0455477	0.222666	10.2523	0.101498	0.66691	0.0165094	4.44705	0.229654
LN_NAD_052051_elav repo ctr 3_31	150	750	1142	0.143801	0.00247807	0.00263458	1.62313	0.00286802	0.025534	0.0263827	0.00033374	0.0304168	0.149011	7.44633	0.074834	0.478101	0.0185068	3.6835	0.336541
LN_NAD_052052_elav repo ctr 4_32	150	750	1577	0.0963378	0.00198702	0.00199542	1.33834	0.00154662	0.00584087	0.0159392	0.000283347	0.0177408	0.0233112	4.30817	0.0616117	0.319893	0.0144107	2.60084	0.157382
LN_NAD_052053_Repro ctr 1_33	150	750	1139.5	0.126132	0.00156703	0.00182094	1.45606	0.00307774	0.0286901	0.0151933	0.000330326	0.0292281	0.142945	2.99032	0.0821404	0.333976	0.00977357	2.92966	0.081616
LN_NAD_052054_Repro ctr 2_34	150	750	1186	0.219519	0.0016995	0.00225665	1.56683	0.00193048	0.0397921	0.0181072	0.000355798	0.0264581	0.250136	3.32194	0.0577136	0.337721	0.00796057	2.79948	0.0662106
LN_NAD_052055_Repro ctr 3_35	150	750	749	0.158154	0.00274751	0.00458167	2.0058	0.00523578	0.0100382	0.0248365	0.000572964	0.0563667	0.0621745	5.22626	0.123739	0.482811	0.0189039	4.19496	0.191178
LN_NAD_052056_Repro ctr 4_36	150	750	1076.5	0.131508	0.00230954	0.00274566	1.85384	0.0032311	0.0130805	0.0221775	0.000432031	0.0388815	0.0314994	3.80024	0.0569117	0.37314	0.0167826	3.455	0.100598
LN_NAD_052057_repo nmn 1_37	150	750	1161.5	0.121747	0.0082995	0.00510927	1.56355	0.00349653	0.00549655	0.0226439	0.000565345	0.0424856	0.0308467	4.21291	0.047682	0.378177	0.0118091	3.27572	0.15898
LN_NAD_052058_repo nmn 2_38	150	750	1281	0.0949806	0.00886588	0.00456972	1.22564	0.00118973	0.0141668	0.0206556	0.000648033	0.0399302	0.0171961	3.58205	0.0489685	0.315804	0.00899418	3.0555	0.234835
LN_NAD_052059_repo nmn 3_39	150	750	1325	0.088749	0.0123832	0.00438709	1.2533	0.00245025	0.00694417	0.0181433	0.000568273	0.0354134	0.039029	3.18731	0.0498694	0.332131	0.0117354	3.14639	0.214602
LN_NAD_052060_repo nmn 4_40	150	750	1173.5	0.0892301	0.00819774	0.00566438	1.32352	0.00312418	0.00504606	0.0272446	0.000786779	0.0366969	0.0242969	5.11588	0.0666375	0.478955	0.0116033	3.64589	0.192582
LN_NAD_052061_elav repo nmn 1_41	150	750	1374.5	0.0515753	0.00791378	0.00812533	1.29561	0.00292684	0.00577016	0.0209046	0.000749069	0.0319254	0.0214011	6.27961	0.0684482	0.374195	0.0128116	3.77964	0.221537
LN_NAD_052062_elav repo nmn 2_42	150	750	1180	0.0776344	0.00971695	0.0141043	1.79569	0.00325927	0.00722442	0.0394893	0.00149323	0.0522939	0.0190073	8.64275	0.0817129	0.520947	0.0219434	4.79456	0.432673
LN_NAD_052063_elav repo nmn 3_43	150	750	1273	0.0592816	0.0107518	0.0123749	1.43481	0.00334096	0.00713808	0.0353712	0.00118426	0.0505535	0.072422	10.1092	0.098695	0.537517	0.0170647	4.42714	0.435259
LN_NAD_052064_elav repo nmn 4_44	150	750	964	0.0684232	0.0141368	0.014904	1.62981	0.00298035	0.0214576	0.0337958	0.00119269	0.0561643	0.320953	12.2445	0.117874	0.675347	0.0210311	4.78996	0.500143
