# Supplementary material for: The NAD+ precursor NMN activates dSarm to trigger axon degeneration in Drosophila
Source: eLife journal article supplement (doi:10.7554/elife.80245), 2022-12-07
Supplement: fig2-figsupp1-data1 [file 2 S1B qRTPCR.xlsx]

## Sheet: Sheet1
Gene	Cq values in triplicates
dNaam	22.6537	21.2914	20.2816
Naprt	22.6484	22.1319	23.1515
NADsyn	24.5045	24.0896	24.4422
Axed	23.0452	23.0292	22.888
dSarm	19.8595	20.067	20.3055
Hiw	22.9409	22.4881	22.5852
dNRKendogenous	23.0104	23.3837	22.3323
dNmnat	22.4229	22.6232	22.6594
Technical triplicates for each gene	Abundance
dNaam	1
dNaam	2.75
dNaam	0.5
Naprt	1
Naprt	1.53
Naprt	0.7
NADsyn	1
NADsyn	1.43
NADsyn	1.04
Axed	1
Axed	1.08
Axed	1.11
dSarm	1
dSarm	0.93
dSarm	0.73
Hiw	1
Hiw	1.46
Hiw	1.27
dNRKend	1
dNRKend	0.83
dNRKend	1.59
dNmnat	1
dNmnat	0.93
dNmnat	0.84
