# Supplementary material for: The NAD+ precursor NMN activates dSarm to trigger axon degeneration in Drosophila
Source: eLife journal article supplement (doi:10.7554/elife.80245), 2022-12-07
Supplement: fig2-figsupp1-data1 [file elife-80245-fig2-figsupp1-data1-v2.zip]

## Sheet: fly heads 2021
		eppendorf nº	fly heads	weight (mg)
		1	50	4.28
		2	50	4.16
		3	50	3.92
		4	50	4.62
		5	50	4.4
		6	50	4.82
		7	50	4.57
		8	50	4.22
		9	50	4.17
		10	50	4.13
		11	50	4.3
		12	50	4.06
		13	50	4.22
		14	50	4.24
		15	50	3.83
		16	50	4.57
		17	50	3.94
		18	50	4.36
		19	50	4.55
		20	50	5.47
				resuspension		after sonication/centrifuge			after G25 (PD10)
		fly heads	n.	mg FW	µl lysis	ul	mg/ml	µg tot	ul	mg/ml	µg tot
		eppendorf 1-10	500	43.29	400	390	1.425	555.75	~400	0.975	390
		eppendorf 11-20	500	43.54	250	250	4.9	1225	~250	4.35	1087.5
			I rep	II rep
			epp 1-10	epp 11-20	AVG	stdev
	Nrk	pmol/h/ug	0.11	0.13	0.12	0.0141421
	Naprt	pmol/h/ug	nd	0.02	0.01	0.0141421
	Qaprt	pmol/h/ug	0.065	0.05	0.0575	0.0106066
	dNaam	nmol/h/ug	0.355	0.39	0.3725	0.0247487
	NaDS	pmol/h/ug	1.21	2.8	2.005	1.1243
	dNamnat	nmol/h/ug	0.0235	0.025	0.02425	0.00106066
	Nampt	nmol/h/ug	nd	nd	nd	-
			I rep	II rep
			epp 1-10	epp 11-20	AVG	stdev
	Nrk	pmol/h/mgFW	1.386	3.658	2.522	1.60655
	Naprt	pmol/h/mgFW	nd	0.563	0.2815	0.398101
	Qaprt	pmol/h/mgFW	0.829	1.407	1.118	0.408708
	dNaam	nmol/h/mgFW	4.567	10.973	7.77	4.52973
	NaDS	pmol/h/mgFW	15.626	78.778	47.202	44.6552
	dNamnat	pmol/h/mgFW	0.303	0.703	0.503	0.282843
	Nampt	pmol/h/mgFW	nd	nd	nd	-
			I rep	II rep
			epp 1-10	epp 11-20	AVG	stdev
	Nrk	pmol/h/50 heads	5.885	15.925	10.905	7.09935
	Naprt	pmol/h/50 heads	nd	2.45	1.225	1.73241
	Qaprt	pmol/h/50 heads	3.565	6.138	4.8515	1.81939
	dNaam	nmol/h/50 heads	19.815	47.775	33.795	19.7707
	NaDS	pmol/h/50 heads	68.06	343	205.53	194.412
	dNamnat	pmol/h/50 heads	1.317	3.063	2.19	1.23461
	Nampt	pmol/h/50 heads	nd	nd	nd	-

## Sheet: summary
		2021 fly heads (n2)
		pmol/h/mgFW	stand dev		pmol/h/ug prot	stand dev		pmol/h/50 heads	stand dev
	NAMPT	nd	-		nd	-		nd	-
	NRK	2.522	1.60655		0.12	0.0141421		10.905	7.09935
	NaPRT	0.2815	0.398101		0.01	0.0141421		1.225	1.73241
	QaPRT	1.118	0.408708		0.0575	0.0106066		4.8515	1.81939
	Nam deamidase	7770	4529.73		372.5	24.7487		33795	19770.7
	NMNAT	0.503	0.282843		0.02425	0.00106066		2.19	1.23461
	NADS	47.202	44.6552		2.005	1.1243		205.53	194.412
	value obtained under modified assay conditions (+Pi & high Mg2+)
