# Supplementary material for: The NAD+ precursor NMN activates dSarm to trigger axon degeneration in Drosophila
Source: eLife journal article supplement (doi:10.7554/elife.80245), 2022-12-07
Supplement: fig2-figsupp2-data1 [file elife-80245-fig2-figsupp2-data1-v2.zip]

## Sheet: Sheet1
	Cq values in triplicates for each gene and genotype
Genotype	dNaam			Naprt			dNRKendogenous			dNmnat			NADsyn			dSarm			Hiw			Axed			NMN-deamidase
Actin-Gal4	22.9363	23.0256	23.0429	24.9917	24.4218	24.9751	24.6596	24.5266	24.4303	24.0281	23.7421	23.7247	25.8014	25.8822	25.8086	21.6033	21.65	21.2885	23.9429	23.6475	23.4838	23.3995	23.1768	23.4116	40	40	40
UAS-NMN-Deamidase	21.8397	21.7498	21.4506	23.7408	23.5631	23.5634	22.9048	22.8476	22.9681	22.8617	22.7459	22.9792	23.7618	23.6165	23.7586	19.5872	19.6181	19.5283	21.8051	21.7331	21.4601	21.9899	22.1475	22.2127	28.2237	28.1747	28.3515
UAS-NMN-Deamidasedead	21.8781	21.872	21.72	23.4215	23.2271	23.3919	22.9809	23.2111	23.0783	22.6686	22.9116	22.8097	22.4356	23.9161	23.9568	19.5107	19.6307	19.7182	21.868	21.7894	21.8371	22.2418	22.3925	22.2036	28.0793	27.8035	28.1247
Actin>NMN-Deamidase	21.9848	22.2901	22.4385	23.6135	23.8112	23.5129	23.1077	23.4231	23.1773	23.2986	23.3081	23.3734	23.5105	24.092	24.1839	20.0698	19.8445	19.8932	22.5331	22.3913	22.3083	22.5699	22.6314	22.6214	23.4744	23.2093	23.662
Actin>NMN-Deamidasedead	21.9643	21.9829	22.0655	23.7465	23.9393	23.8462	23.4551	23.9576	23.8528	22.9971	22.7929	23.0361	24.0336	24.2829	24.3472	19.9184	19.9099	19.9459	22.1048	22.119	22.1927	22.8713	22.7389	22.714	23.262	23.6346	23.6474
dNaam			dNmnat
Genotype in Techincal Triplicates	Relative Abundance		Genotype in Techincal Triplicates	Relative Abundance
Actin-Gal4	1		Actin-Gal4	1
Actin-Gal4	0.79		Actin-Gal4	1.02
Actin-Gal4	0.66		Actin-Gal4	0.88
UAS-NMN-Deamidase	0.7		UAS-NMN-Deamidase	0.74
UAS-NMN-Deamidase	0.73		UAS-NMN-Deamidase	0.78
UAS-NMN-Deamidase	0.84		UAS-NMN-Deamidase	0.62
UAS-NMN-Deamidasedead	0.79		UAS-NMN-Deamidasedead	0.98
UAS-NMN-Deamidasedead	0.75		UAS-NMN-Deamidasedead	0.78
UAS-NMN-Deamidasedead	0.89		UAS-NMN-Deamidasedead	0.89
Actin>NMN-Deamidase	1.06		Actin>NMN-Deamidase	0.91
Actin>NMN-Deamidase	0.64		Actin>NMN-Deamidase	0.67
Actin>NMN-Deamidase	0.66		Actin>NMN-Deamidase	0.74
Actin>NMN-Deamidasedead	1.03		Actin>NMN-Deamidasedead	1.08
Actin>NMN-Deamidasedead	1.05		Actin>NMN-Deamidasedead	1.28
Actin>NMN-Deamidaseead	1.04		Actin>NMN-Deamidaseead	1.13
Naprt			NADsyn
Genotype in Techincal Triplicates	Relative Abundance		Genotype in Techincal Triplicates	Relative Abundance
Actin-Gal4	1		Actin-Gal4	1
Actin-Gal4	1.24		Actin-Gal4	0.79
Actin-Gal4	0.72		Actin-Gal4	0.71
UAS-NMN-Deamidase	0.78		UAS-NMN-Deamidase	1.35
UAS-NMN-Deamidase	0.87		UAS-NMN-Deamidase	1.46
UAS-NMN-Deamidase	0.81		UAS-NMN-Deamidase	1.23
UAS-NMN-Deamidasedead	1.13		UAS-NMN-Deamidasedead	3.92
UAS-NMN-Deamidasedead	1.22		UAS-NMN-Deamidasedead	1.33
UAS-NMN-Deamidasedead	1.16		UAS-NMN-Deamidasedead	1.37
Actin>NMN-Deamidase	1.43		Actin>NMN-Deamidase	2.68
Actin>NMN-Deamidase	0.92		Actin>NMN-Deamidase	1.33
Actin>NMN-Deamidase	1.31		Actin>NMN-Deamidase	1.44
Actin>NMN-Deamidasedead	1.25		Actin>NMN-Deamidasedead	1.79
Actin>NMN-Deamidasedead	1.13		Actin>NMN-Deamidasedead	1.56
Actin>NMN-Deamidaseead	1.26		Actin>NMN-Deamidaseead	1.56
dNRKendogenous			dSarm
Genotype in Techincal Triplicates	Relative Abundance		Genotype in Techincal Triplicates	Relative Abundance
Actin-Gal4	1		Actin-Gal4	1
Actin-Gal4	0.92		Actin-Gal4	0.81
Actin-Gal4	0.83		Actin-Gal4	0.88
UAS-NMN-Deamidase	1.11		UAS-NMN-Deamidase	1.33
UAS-NMN-Deamidase	1.13		UAS-NMN-Deamidase	1.27
UAS-NMN-Deamidase	0.97		UAS-NMN-Deamidase	1.26
UAS-NMN-Deamidasedead	1.22		UAS-NMN-Deamidasedead	1.62
UAS-NMN-Deamidasedead	0.98		UAS-NMN-Deamidasedead	1.41
UAS-NMN-Deamidasedead	1.14		UAS-NMN-Deamidasedead	1.41
Actin>NMN-Deamidase	1.61		Actin>NMN-Deamidase	1.59
Actin>NMN-Deamidase	0.96		Actin>NMN-Deamidase	1.38
Actin>NMN-Deamidase	1.31		Actin>NMN-Deamidase	1.54
Actin>NMN-Deamidasedead	1.21		Actin>NMN-Deamidasedead	1.69
Actin>NMN-Deamidasedead	0.88		Actin>NMN-Deamidasedead	1.76
Actin>NMN-Deamidaseead	1		Actin>NMN-Deamidaseead	1.8
Hiw			Axed
Genotype in Techincal Triplicates	Relative Abundance		Genotype in Techincal Triplicates	Relative Abundance
Actin-Gal4	1		Actin-Gal4	1
Actin-Gal4	1.03		Actin-Gal4	0.98
Actin-Gal4	0.98		Actin-Gal4	0.71
UAS-NMN-Deamidase	1.45		UAS-NMN-Deamidase	0.87
UAS-NMN-Deamidase	1.49		UAS-NMN-Deamidase	0.77
UAS-NMN-Deamidase	1.67		UAS-NMN-Deamidase	0.68
UAS-NMN-Deamidasedead	1.6		UAS-NMN-Deamidasedead	0.85
UAS-NMN-Deamidasedead	1.6		UAS-NMN-Deamidasedead	0.72
UAS-NMN-Deamidasedead	1.64		UAS-NMN-Deamidasedead	0.88
Actin>NMN-Deamidase	1.46		Actin>NMN-Deamidase	0.97
Actin>NMN-Deamidase	1.19		Actin>NMN-Deamidase	0.69
Actin>NMN-Deamidase	1.46		Actin>NMN-Deamidase	0.81
Actin>NMN-Deamidasedead	1.88		Actin>NMN-Deamidasedead	0.76
Actin>NMN-Deamidasedead	1.92		Actin>NMN-Deamidasedead	0.86
Actin>NMN-Deamidaseead	1.92		Actin>NMN-Deamidaseead	0.92
NMN-Deamidase
Genotype in Techincal Triplicates	Relative Abundance
Actin-Gal4	1
Actin-Gal4	0.84
Actin-Gal4	0.71
UAS-NMN-Deamidase	1152.55
UAS-NMN-Deamidase	1167.67
UAS-NMN-Deamidase	960.97
UAS-NMN-Deamidasedead	1473.81
UAS-NMN-Deamidasedead	1684.04
UAS-NMN-Deamidasedead	1435.1
Actin>NMN-Deamidase	51720.5
Actin>NMN-Deamidase	46108.1
Actin>NMN-Deamidase	38944.4
Actin>NMN-Deamidasedead	57530.5
Actin>NMN-Deamidasedead	45837.5
Actin>NMN-Deamidaseead	47751.7
