# Supplementary material for: The NAD+ precursor NMN activates dSarm to trigger axon degeneration in Drosophila
Source: eLife journal article supplement (doi:10.7554/elife.80245), 2022-12-07
Supplement: fig3-data1 [file 3 optogenetics.xlsx]

## Sheet: Grooming behavior quant
	Grooming behavior quantification Figure 3
	Quantification grooming
	#		nmn deamidase before injury
			1	2	3	4	5	6	7	8	9	10	11	12	13	14	15	16	17	18	19	20	21	22	23	24	25	26	27	28	29	30	31	32	33	34	35	36	37	38	39	40	41	42	43	44	45	46	47
	1																																			1		1	1	1	1	1
	2																																		1	1	1	1
	3																																1	1	1	1	1	1	1		1	1
	4																																1
	5																																1	1	1	1	1	1	1	1	1	1	1	1	1
	6																																		1	1	1	1			1	1	1
	7																																1	1	1	1	1	1	1
	8																																1	1	1	1	1	1						1	1		1	1
	9																																			1	1			1
	10																																1	1	1	1
	11																																1	1	1	1	1
	12																																1	1	1
	13																																1	1			1
	14																																1	1	1	1	1	1	1	1	1	1					1	1
	15																																					1
	SUM		0	0	0	0	0	0	0	0	0	0	0	0	0	0	0	0	0	0	0	0	0	0	0	0	0	0	0	0	0	0	10	9	10	11	10	9	5	4	5	5	2	2	2	0	2	2	0
	%		0	0	0	0	0	0	0	0	0	0	0	0	0	0	0	0	0	0	0	0	0	0	0	0	0	0	0	0	0	0	66.6667	60	66.6667	73.3333	66.6667	60	33.3333	26.6667	33.3333	33.3333	13.3333	13.3333	13.3333	0	13.3333	13.3333	0
	#		nmn deamidase after injury
			1	2	3	4	5	6	7	8	9	10	11	12	13	14	15	16	17	18	19	20	21	22	23	24	25	26	27	28	29	30	31	32	33	34	35	36	37	38	39	40	41	42	43	44	45	46	47
	1																																1
	2																																			1		1	1	1	1	1	1	1	1	1
	3																																	1
	4																																1	1
	5																																					1	1
	6
	7																																1						1	1		1
	8																																1	1	1	1	1			1	1	1
	9																																1	1	1	1	1	1						1
	10																																1	1	1					1	1	1
	11																																1	1	1	1	1	1	1	1
	12																																		1	1	1	1	1
	13																																						1	1			1	1	1		1	1	1
	14																																			1	1	1		1	1		1	1	1	1	1	1	1
	15																																1	1	1	1	1	1	1	1	1	1
	SUM		0	0	0	0	0	0	0	0	0	0	0	0	0	0	0	0	0	0	0	0	0	0	0	0	0	0	0	0	0	0	8	7	6	7	6	7	7	8	5	5	3	4	3	2	2	2	2
	%		0	0	0	0	0	0	0	0	0	0	0	0	0	0	0	0	0	0	0	0	0	0	0	0	0	0	0	0	0	0	53.3333	46.6667	40	46.6667	40	46.6667	46.6667	53.3333	33.3333	33.3333	20	26.6667	20	13.3333	13.3333	13.3333	13.3333
	#		nmn dead before injury
			1	2	3	4	5	6	7	8	9	10	11	12	13	14	15	16	17	18	19	20	21	22	23	24	25	26	27	28	29	30	31	32	33	34	35	36	37	38	39	40	41	42	43	44	45	46	47
	1																																1	1	1	1	1	1	1	1	1	1	1			1	1	1	1
	2
	3																																	1	1	1	1	1	1	1	1	1
	4																																		1							1
	5																																	1	1	1	1	1	1	1	1	1	1	1	1	1	1	1	1
	6																																1	1	1	1	1
	7
	8																																	1		1	1						1	1	1	1
	9																																1					1		1	1
	10																																			1	1	1	1	1	1	1
	11																																		1	1				1			1	1	1	1	1	1
	12																																1	1	1	1	1	1	1		1	1							1
	13																																				1
	14																																		1	1							1	1	1	1	1	1	1
	15																																1	1	1	1		1
	16																																															1	1
	SUM		0	0	0	0	0	0	0	0	0	0	0	0	0	0	0	0	0	0	0	0	0	0	0	0	0	0	0	0	0	0	5	7	9	10	8	7	5	6	6	6	5	4	4	5	4	4	4
	%		0	0	0	0	0	0	0	0	0	0	0	0	0	0	0	0	0	0	0	0	0	0	0	0	0	0	0	0	0	0	33.3333	46.6667	60	66.6667	53.3333	46.6667	33.3333	40	40	40	33.3333	26.6667	26.6667	33.3333	26.6667	26.6667	26.6667
	#		nmn dead after injury
			1	2	3	4	5	6	7	8	9	10	11	12	13	14	15	16	17	18	19	20	21	22	23	24	25	26	27	28	29	30	31	32	33	34	35	36	37	38	39	40	41	42	43	44	45	46	47
	1
	2
	3
	4
	5
	6																																					1
	7
	8
	9
	10																																														1
	11
	12
	13
	14
	15
	16
	SUM		0	0	0	0	0	0	0	0	0	0	0	0	0	0	0	0	0	0	0	0	0	0	0	0	0	0	0	0	0	0	0	0	0	0	0	1	0	0	0	0	0	0	0	0	1	0	0
	%		0	0	0	0	0	0	0	0	0	0	0	0	0	0	0	0	0	0	0	0	0	0	0	0	0	0	0	0	0	0	0	0	0	0	0	6.66667	0	0	0	0	0	0	0	0	6.66667	0	0
	#		GFP before injury
			1	2	3	4	5	6	7	8	9	10	11	12	13	14	15	16	17	18	19	20	21	22	23	24	25	26	27	28	29	30	31	32	33	34	35	36	37	38	39	40	41	42	43	44	45	46	47
	1																																1	1	1	1	1		1	1	1	1	1	1	1
	2																																1	1	1	1	1	1	1	1	1	1
	3																																1	1	1	1	1	1	1	1	1	1
	4																																1	1	1	1	1	1	1			1
	5																																				1					1
	6																																				1	1	1	1	1
	7																																1	1	1	1			1	1	1	1
	8																																			1	1	1	1		1	1	1	1
	9																																		1	1	1	1	1	1					1	1	1
	10																																				1	1	1	1	1	1
	11																																1	1	1	1	1	1	1	1
	12																																1	1	1	1
	13																																1	1	1	1	1
	14																																1	1	1	1	1		1	1
	15																																1	1	1	1	1
	16																																	1	1
	17																																	1	1	1
	SUM		0	0	0	0	0	0	0	0	0	0	0	0	0	0	0	0	0	0	0	0	0	0	0	0	0	0	0	0	0	0	10	12	13	12	13	8	11	9	7	8	2	2	2	1	1	0	0
	%		0	0	0	0	0	0	0	0	0	0	0	0	0	0	0	0	0	0	0	0	0	0	0	0	0	0	0	0	0	0	66.6667	80	86.6667	80	86.6667	53.3333	73.3333	60	46.6667	53.3333	13.3333	13.3333	13.3333	6.66667	6.66667	0	0
	#		GFP after injury
			1	2	3	4	5	6	7	8	9	10	11	12	13	14	15	16	17	18	19	20	21	22	23	24	25	26	27	28	29	30	31	32	33	34	35	36	37	38	39	40	41	42	43	44	45	46	47
	1																																							1				1	1	1	1
	2
	3																																										1	1	1	1	1
	4
	5																																									1	1
	6
	7																																										1	1	1	1	1	1	1
	8
	9																																	1				1			1
	10																																										1	1	1	1
	11
	12																																			1				1	1	1					1	1	1
	13
	14																																						1
	15																																														1	1
	16
	17																																										1	1	1	1
	SUM		0	0	0	0	0	0	0	0	0	0	0	0	0	0	0	0	0	0	0	0	0	0	0	0	0	0	0	0	0	0	0	1	0	1	0	1	1	2	2	2	4	4	4	4	5	3	2
	%		0	0	0	0	0	0	0	0	0	0	0	0	0	0	0	0	0	0	0	0	0	0	0	0	0	0	0	0	0	0	0	6.66667	0	6.66667	0	6.66667	6.66667	13.3333	13.3333	13.3333	26.6667	26.6667	26.6667	26.6667	33.3333	20	13.3333
		total:								1st	2nd	3rd
		bins per 10 sec stimulus:
		NMN pre								78	79	97
		NMN post								66	82	100
		dead pre								69	82	87
		dead post								1	2	6
		GFP pre								99	88	64
		GFP post								10	1	6
		bins per 10 sec stimulus per animal
		NMN pre								5.2	5.26667	6.46667
		NMN post								4.4	5.46667	6.66667
		dead pre								4.6	5.46667	5.8
		dead post								0.0666667	0.133333	0.4
		GFP pre								6.6	5.86667	4.26667
		GFP post								0.666667	0.0666667	0.4
		Average bins / animal / 10 sec stimulus:								avg	sd	sem
		NMN pre								5.64444	0.712845	0.411561
		NMN post								5.51111	1.13399	0.654708
		dead pre								5.28889	0.619438	0.357633
		dead post								0.2	0.176383	0.101835
		GFP pre								5.57778	1.19319	0.688889
		GFP post								0.377778	0.300617	0.173561
[truncated: 103 more columns]
