# Supplementary material for: The NAD+ precursor NMN activates dSarm to trigger axon degeneration in Drosophila
Source: eLife journal article supplement (doi:10.7554/elife.80245), 2022-12-07
Supplement: fig3-figsupp1-data1 [file elife-80245-fig3-figsupp1-data1-v2.zip]

## Sheet: wt quant
	Quantification grooming
	#		nmn deamidase before injury
			1	2	3	4	5	6	7	8	9	10	11	12	13	14	15	16	17	18	19	20	21	22	23	24	25	26	27	28	29	30	31	32	33	34	35	36	37	38	39	40	41	42	43	44	45	46	47
#7	1																																1	1	1	1
#8	2																																							1	1	1	1	1	1	1
#12	3																																						1	1	1	1						1	1
#16	5																																1	1	1	1
#17	6																																1	1									1	1	1	1	1
#20	7																																1	1	1		1	1
#24	9																																									1		1	1	1
#26	10																																1	1	1	1
#27	11																																1	1	1	1	1	1	1
#28	12																																	1	1	1	1	1	1	1
#29	13																																1	1	1	1	1	1		1	1		1	1	1	1	1	1	1
#30	14																																1	1
#31	15																																			1
#32	16																																1	1	1	1	1	1
#34	17																																1	1	1	1	1	1	1	1	1	1
	SUM		0	0	0	0	0	0	0	0	0	0	0	0	0	0	0	0	0	0	0	0	0	0	0	0	0	0	0	0	0	0	10	11	9	9	6	6	4	5	4	4	3	4	4	4	2	2	2
	%		0	0	0	0	0	0	0	0	0	0	0	0	0	0	0	0	0	0	0	0	0	0	0	0	0	0	0	0	0	0	66.6667	73.3333	60	60	40	40	26.6667	33.3333	26.6667	26.6667	20	26.6667	26.6667	26.6667	13.3333	13.3333	13.3333
	#		nmn deamidase 7 days after
			1	2	3	4	5	6	7	8	9	10	11	12	13	14	15	16	17	18	19	20	21	22	23	24	25	26	27	28	29	30	31	32	33	34	35	36	37	38	39	40	41	42	43	44	45	46	47
#7	1																																	1								1		1	1	1			1
#8	2																																1	1	1	1	1	1		1
#12	3																																1	1	1	1	1	1					1	1	1	1
#16	5																																1	1	1	1	1	1	1	1	1	1
#17	6																																				1		1	1		1
#20	7																																1	1	1	1		1				1
#24	9																																1	1	1	1	1				1	1			1	1	1	1
#26	10																																1	1	1	1	1	1	1	1
#27	11																																1	1	1	1				1	1	1	1	1	1	1
#28	12																																1	1	1	1
#29	13																																1	1	1	1	1	1	1	1	1	1			1	1	1	1	1
#30	14																																1								1	1	1	1	1	1	1	1	1
#31	15																																1	1
#32	16																																1	1	1
#34	17																																1	1	1	1	1	1	1	1	1	1
	SUM		0	0	0	0	0	0	0	0	0	0	0	0	0	0	0	0	0	0	0	0	0	0	0	0	0	0	0	0	0	0	13	13	11	10	8	7	5	7	6	9	3	4	6	6	3	3	3
	%		0	0	0	0	0	0	0	0	0	0	0	0	0	0	0	0	0	0	0	0	0	0	0	0	0	0	0	0	0	0	86.6667	86.6667	73.3333	66.6667	53.3333	46.6667	33.3333	46.6667	40	60	20	26.6667	40	40	20	20	20
	#		nmn deamidase 14 days after
			1	2	3	4	5	6	7	8	9	10	11	12	13	14	15	16	17	18	19	20	21	22	23	24	25	26	27	28	29	30	31	32	33	34	35	36	37	38	39	40	41	42	43	44	45	46	47
#7	1																																	1	1							1	1	1	1	1	1	1	1
#8	2																																1	1	1	1		1	1	1	1	1
#12	3
#16	5																																1	1	1	1	1	1	1				1	1	1	1	1
#17	6																																	1	1	1		1		1	1		1	1
#20	7																																1	1	1	1	1									1	1	1	1
#24	9																																1	1			1		1
#26	10																																1	1	1	1	1	1
#27	11																																1	1	1	1	1	1
#28	12																																1													1	1	1	1
#29	13
#30	14																																1	1	1	1	1	1	1	1	1	1	1	1	1	1	1	1	1
#31	15
#32	16																																						1
#34	17																																1	1	1	1	1	1	1	1	1	1	1	1
	SUM		0	0	0	0	0	0	0	0	0	0	0	0	0	0	0	0	0	0	0	0	0	0	0	0	0	0	0	0	0	0	9	10	9	8	7	7	6	4	4	4	5	5	3	5	5	4	4
	%		0	0	0	0	0	0	0	0	0	0	0	0	0	0	0	0	0	0	0	0	0	0	0	0	0	0	0	0	0	0	60	66.6667	60	53.3333	46.6667	46.6667	40	26.6667	26.6667	26.6667	33.3333	33.3333	20	33.3333	33.3333	26.6667	26.6667
		total:								1st	2nd	3rd
		bins per 10 sec stimulus:
		NMN pre								68	70	66
		NMN 7								89	95	63
		nmn 14								68	79	59
		bins per 10 sec stimulus per animal
		NMN pre								4.53333	4.66667	4.4
		NMN 7								5.93333	6.33333	4.2
		nmn 14								4.53333	5.26667	3.93333
		Average bins / animal / 10 sec stimulus:								avg	sd	sem
		NMN pre								4.53333	0.133333	0.07698
		NMN 7								5.48889	1.13399	0.654708
		nmn 14								4.57778	0.667777	0.385541
[truncated: 103 more columns]
