# Supplementary material for: The NAD+ precursor NMN activates dSarm to trigger axon degeneration in Drosophila
Source: eLife journal article supplement (doi:10.7554/elife.80245), 2022-12-07
Supplement: fig4-data1 [file 4C mNAMPT.xlsx]

## Sheet: Sheet1
				Nicotinamide mononucleotide (NMN)	Nicotinamide Riboside (NR)	Nicotinate Riboside (NaR)	Nicotinic acid mononucleotide (NaMN)	Nicotinic acid	3-OH-Kynurenine	NAD	Nicotinamide	Kynurenine	Tryptophan	3-OH-Anthranilic acid	Nicotinic acid adenine dinucleotide (NaAD)	Xanthurenic acid	Kynurenic acid	cADPR	ADPR
Sample_ID	Volume Extraction Metabolites (µL)	Volume Extraction Proteins (µL)	Total protein content (µg/mL)	Calc. Conc. (µM)	Calc. Conc. (µM)	Calc. Conc. (µM)	Calc. Conc. (µM)	Calc. Conc. (µM)	Calc. Conc. (µM)	Calc. Conc. (µM)	Calc. Conc. (µM)	Calc. Conc. (µM)	Calc. Conc. (µM)	Calc. Conc. (µM)	Calc. Conc. (µM)	Calc. Conc. (µM)	Calc. Conc. (µM)	Calc. Conc. (µM)	Calc. Conc. (µM)
LN_NAD_0122_cActin_I_1	150	750	622.2	2.01931	0.0495245	0.00171907	0.0200396	0.240486	20.4596	8.47871	0.04645	0.240324	3.48824	N.D	0.0254478	10.1115	0.0810065	0.304647	0.0261108
LN_NAD_0122_cActin_II_2	150	750	516.85	1.9125	0.0336025	0.00104293	0.0113932	0.0722033	12.8815	6.87352	0.0252778	0.188945	2.25777	0.0655559	0.0175939	8.56315	0.0668869	0.0452089	0.0170946
LN_NAD_0122_cActin_III_3	150	750	496.95	1.78436	0.0257562	0.000579305	0.00917865	0.0971823	14.6117	6.25077	0.117563	0.57842	2.62589	0.0342924	0.00667366	7.50646	0.118746	0.0798124	0.015049
LN_NAD_0122_cActin_IV_4	150	750	608.1	2.04858	0.0534838	0.000927486	0.0160034	0.216547	16.408	8.40982	0.0954198	0.377057	2.5229	0.0551529	0.0145402	11.1345	0.207631	0.312478	0.0180189
LN_NAD_0122_mANAMPT_I_21	150	750	665.7	2.11207	0.0924746	0.000986352	0.0151082	0.131069	27.8296	9.22073	0.0354885	0.224284	3.65107	0.0734382	0.0120985	28.2619	0.903959	0.238326	0.0322895
LN_NAD_0122_mANAMPT_II_22	150	750	625.95	2.21746	0.0982911	0.000926534	0.0121033	0.149972	35.2069	9.02049	0.0399863	0.213282	3.57958	0.0707493	0.0117991	29.3318	0.813185	0.46384	0.0323319
LN_NAD_0122_mANAMPT_III_23	150	750	614.15	2.13953	0.0859942	0.00101889	0.015916	0.169051	29.7255	7.26986	0.0371404	0.316619	3.86601	0.0771924	0.0111635	24.7671	0.885844	0.291706	0.0248595
LN_NAD_0122_mANAMPT_IV_24	150	750	623.3	2.01362	0.104936	0.00134288	0.0135055	0.127198	25.2418	7.45609	0.0354107	0.152267	3.12315	0.0461942	0.0105852	29.682	0.94009	0.285824	0.0229301
LN_NAD_0122_cmNAMPT_I_25	150	750	510.4	2.3005	0.0355686	0.00107473	0.0111981	0.13519	3.34289	9.47413	0.0454467	0.145516	1.81122	0.0445309	0.0240761	7.60925	0.104338	0.121578	0.0207241
LN_NAD_0122_cmNAMPT_II_26	150	750	451.2	1.78335	0.0212235	0.000482153	0.00733966	0.0835956	7.03587	5.66466	0.0845345	0.232806	2.59191	0.0538108	0.0118174	5.55507	0.0971658	0.0661092	0.0109932
LN_NAD_0122_cmNAMPT_III_27	150	750	566.85	2.0572	0.0584333	0.00171583	0.017483	0.191827	8.83402	9.15962	0.0586922	0.224962	1.83489	0.0573769	0.0215965	10.6679	0.342737	0.184132	0.0208405
LN_NAD_0122_cmNAMPT_IV_28	150	750	481	2.08693	0.0340246	0.00119151	0.0104341	0.127423	3.27085	8.15252	0.0372194	0.191831	2.09081	0.0743647	0.011499	4.79468	0.118939	0.0797454	0.0175955
