# Supplementary material for: The NAD+ precursor NMN activates dSarm to trigger axon degeneration in Drosophila
Source: eLife journal article supplement (doi:10.7554/elife.80245), 2022-12-07
Supplement: fig4-figsupp1-data1 [file elife-80245-fig4-figsupp1-data1-v2.zip]

## Sheet: Experiment 1
	Cq values in triplicates for each gene and genotype
Genotype	dNaam			Naprt			Tubulin			dNRKendogenous			dNmnat			NADsyn			Nampt			dSarm			Hiw			Axed
Actin-Gal4	22.9363	23.0256	23.0429	24.9917	24.4218	24.9751	19.4654	19.211	18.9736	24.6596	24.5266	24.4303	24.0281	23.7421	23.7247	25.8014	25.8822	25.8086	32.109	33.0856	33.6964	21.6033	21.65	21.2885	23.9429	23.6475	23.4838	23.3995	23.1768	23.4116
UAS-mNampt	23.7594	23.8037	23.7044	25.8637	25.6028	25.9085	19.7193	19.7561	19.9076	24.1624	23.7591	24.3535	24.6419	24.1797	24.3376	26.559	26.4511	26.4054	27.6111	27.5176	27.5672	22.022	22.0693	21.998	24.312	24.8545	25.3522	24.312	24.8545	25.3522
Actin>mNampt	24.2002	24.2445	24.1701	25.0234	25.4965	25.2975	20.9204	20.8491	20.9761	24.9957	25.1739	25.783	24.5082	24.4858	25.0005	26.9778	26.1207	26.4028	19.7625	19.9125	20.0746	22.4754	22.566	22.528	24.799	24.8546	24.9347	24.6175	26.0915	24.85
dNaam
Genotype in Techincal Triplicates	Relative Abundance
Actin-Gal4	1
Actin-Gal4	0.79
Actin-Gal4	0.66
UAS-mNampt	0.67
UAS-mNampt	0.67
UAS-mNampt	0.8
Actin>mNAMPT	1.14
Actin>mNAMPT	1.05
Actin>mNAMPT	1.21
Naprt
Genotype in Techincal Triplicates	Relative Abundance
Actin-Gal4	1
Actin-Gal4	1.24
Actin-Gal4	0.72
UAS-mNampt	0.65
UAS-mNampt	0.8
UAS-mNampt	0.72
Actin>mNAMPT	2.68
Actin>mNAMPT	1.84
Actin>mNAMPT	2.31
dNRK endogenous
Genotype in Techincal Triplicates	Relative Abundance
Actin-Gal4	1
Actin-Gal4	1.09
Actin-Gal4	1.2
UAS-mNampt	0.59
UAS-mNampt	0.44
UAS-mNampt	0.6
Actin>mNAMPT	0.46
Actin>mNAMPT	0.55
Actin>mNAMPT	0.76
dNmnat
Genotype in Techincal Triplicates	Relative Abundance
Actin-Gal4	1
Actin-Gal4	1.02
Actin-Gal4	0.88
UAS-mNampt	0.78
UAS-mNampt	1.1
UAS-mNampt	1.1
Actin>mNAMPT	1.97
Actin>mNAMPT	1.9
Actin>mNAMPT	1.45
NADsyn
Genotype in Techincal Triplicates	Relative Abundance
Actin-Gal4	1
Actin-Gal4	0.79
Actin-Gal4	0.71
UAS-mNampt	0.71
UAS-mNampt	0.78
UAS-mNampt	0.89
Actin>mNAMPT	1.21
Actin>mNAMPT	2.09
Actin>mNAMPT	1.88
Nampt
Genotype in Techincal Triplicates	Relative Abundance
Actin-Gal4	1
Actin-Gal4	0.43
Actin-Gal4	0.24
UAS-mNampt	26.94
UAS-mNampt	29.49
UAS-mNampt	31.65
Actin>mNAMPT	14278.6
Actin>mNAMPT	12247.6
Actin>mNAMPT	11953.8
dSarm
Genotype in Techincal Triplicates	Relative Abundance
Actin-Gal4	1
Actin-Gal4	0.81
Actin-Gal4	0.88
UAS-mNampt	0.89
UAS-mNampt	0.89
UAS-mNampt	1.03
Actin>mNAMPT	1.5
Actin>mNAMPT	1.34
Actin>mNAMPT	1.5
Hiw
Genotype in Techincal Triplicates	Relative Abundance
Actin-Gal4	1
Actin-Gal4	1.03
Actin-Gal4	0.98
UAS-mNampt	0.92
UAS-mNampt	0.65
UAS-mNampt	0.51
Actin>mNAMPT	1.51
Actin>mNAMPT	1.39
Actin>mNAMPT	1.43
Axed
Genotype in Techincal Triplicates	Relative Abundance
Actin-Gal4	1
Actin-Gal4	0.98
Actin-Gal4	0.71
UAS-mNampt	0.63
UAS-mNampt	0.45
UAS-mNampt	0.35
Actin>mNAMPT	1.18
Actin>mNAMPT	0.4
Actin>mNAMPT	1.04
