# Supplementary material for: The NAD+ precursor NMN activates dSarm to trigger axon degeneration in Drosophila
Source: eLife journal article supplement (doi:10.7554/elife.80245), 2022-12-07
Supplement: fig5-data1 [file 5C NAD quant.xlsx]

## Sheet: Sheet1
rate mol NAD / min /mol enzyme	NAD							NAD + 50 µM NMN
WT dSARM E	4.058	2.492	3.139	2.895	1.802	3.755	3.676	5.606	4.219	4.266	3.936	1.751	5.619	4.811
"K193R" dSARM E	3.57	2.872	3.783	0.86	1.392	4.946	4.783	4.145	2.963	3.909	0.542	1.264	4.128	5.135
