# Supplementary material for: The NAD+ precursor NMN activates dSarm to trigger axon degeneration in Drosophila
Source: eLife journal article supplement (doi:10.7554/elife.80245), 2022-12-07
Supplement: fig6-data1 [file 6A C.xlsx]

## Sheet: Sheet1
day	NMN Deamidase	dsarm(delta)arm (3L)	NMN deamidase, dsarmdeltaArm	NMN deamidase dead (3L)	NMN deamidase dead, dsarmdeltaArm (2nd try and better)	nmnat1	NMN deamidase + nmnat1	NMN deamidasedead + nmnat1
1	6	4	4	13	7	5	12	3
1	10	2	8	10	7	7	10	7
1	11	8	4	8	6	2	10	5
1	13	2	6	11	5	3	5	4
1	9	4	8	7	5	8	7	6
1	13	3	8	14	6	6	7	6
1	12	4	6	5	7	3	4	5
1	10	3	4	5	8	8	12	9
1	11	6	7	10	6	4	13	4
1	10	8	8	9	7	7	15	6
2	7	6	4	11	6	3	14	3
2	8	4	4	10	3	2	7	2
2	9	2	9	9	4	4	8	2
2	9	5	4	12	6	0	10	3
2	10	5	3	9	7	2	15	2
2	8	2	4	9	2	1	7	1
2	8	4	6	8	4	3	13	1
2	14	6	4	10	3	3	11	4
2	5	5	3	11	3	0	4	0
2	13	3	2	7	6	2	8	2
3	8	0	2	11	2	2	12	2
3	9	2	4	10	0	2	13	1
3	8	2	4	8	2	2	3	2
3	12	3	0	7	2	2	7	0
3	11	2	6	5	6	2	9	2
3	13	3	5	9	4	0	8	0
3	10	0	3	11	6	6	10	2
3	12	0	3	7	5	3	9	2
3	7	1	2	12	1	1	7	1
3	12	2	0	4	5	1	8	1
4	12	3	0	8	3	0	11	0
4	10	0	3	12	6	0	4	0
4	8	2	2	7	2	1	8	1
4	9	0	2	9	2	0	6	0
4	7	0	1	11	0	2	5	2
4	12	0	1	12	2	1	7	1
4	10	0	1	6	2	2	10	2
4	7	1	3	10	1	1	3	1
4	9	2	2	11	3	0	4	0
4	10	1	0	9	1	1	5	1
5	13	0	3	6	0	0	8	0
5	10	0	3	10	0	0	4	0
5	9	0	2	7	2	0	2	0
5	8	0	1	12	0	0	2	0
5	11	0	1	8	2	0	5	0
5	9	0	2	12	0	0	4	0
5	14	0	2	12	0	0	3	0
5	11	0	0	15	1	0	4	0
5	11	0	1	6	2	0	5	0
5	14	0	0	7	0	0	4	0
6	8					0	3
6	4					0	6
6	5					0	5
6	5					0	2
6	6					0	2
6	3					0	1
6	8					0	5
6	6					0	8
6	9					0	2
6	7					0	3
7	9					0	1
7	8					0	2
7	10					0	1
7	3					0	2
7	4					0	3
7	10					0	3
7	6					0	2
7	10					0	4
7	6					0	1
7	7					0	3
8	6					0	1
8	3					0	1
8	9					0	1
8	8					0	1
8	5					0	0
8	7					0	1
8	5					0	0
8	7					0	0
8	3					0	2
8	9					0	1
9	9					0	0
9	7					0	1
9	7					0	0
9	4					0	1
9	7					0	0
9	6					0	1
9	3					0	0
9	8					0	0
9	8					0	0
9	5					0	1
10	11					0	0
10	3					0	0
10	9					0	0
10	4					0	0
10	6					0	0
10	4					0	0
10	9					0	0
10	5					0	0
10	7					0	0
10	5					0	0
