# Supplementary material for: The NAD+ precursor NMN activates dSarm to trigger axon degeneration in Drosophila
Source: eLife journal article supplement (doi:10.7554/elife.80245), 2022-12-07
Supplement: fig6-figsupp1-data1 [file 6 S1C tc uas-cas9.xlsx]

## Sheet: UAS-Cas9_quant_adj
	Quantification grooming
	#		60E02/CsChrimson UAS-Cas9 ctrl before injury
			1	2	3	4	5	6	7	8	9	10	11	12	13	14	15	16	17	18	19	20	21	22	23	24	25	26	27	28	29	30	31	32	33	34	35	36	37	38	39	40	41	42	43	44	45	46	47
	1																																1	1	1		1	1	1	1	1	1
	2																																1	1	1		1	1			1	1		1	1	1
	3																																1	1	1
	4																																1	1	1	1			1		1	1	1
	5																																	1	1	1	1	1	1		1	1
	6																																1	1	1		1	1		1	1					1		1	1
	7																																						1	1	1	1	1
	8																																1	1	1	1				1		1
	9																																1	1	1	1	1	1	1	1	1	1
	10																																	1	1	1	1	1			1
	11																																1	1	1	1	1	1	1	1	1	1
	12																																1	1	1	1	1	1			1	1
	13																																1	1	1	1	1	1	1	1	1
	14																																	1	1	1	1												1
	15																																		1		1	1			1	1
	16																																1	1	1	1	1	1		1	1	1	1
	SUM		0	0	0	0	0	0	0	0	0	0	0	0	0	0	0	0	0	0	0	0	0	0	0	0	0	0	0	0	0	0	11	14	15	10	12	11	7	8	13	11	3	1	1	2	0	1	2
	%		0	0	0	0	0	0	0	0	0	0	0	0	0	0	0	0	0	0	0	0	0	0	0	0	0	0	0	0	0	0	68.75	87.5	93.75	62.5	75	68.75	43.75	50	81.25	68.75	18.75	6.25	6.25	12.5	0	6.25	12.5
	#		60E02/CsChrimson UAS-Cas9 ctrl 7dpi
			1	2	3	4	5	6	7	8	9	10	11	12	13	14	15	16	17	18	19	20	21	22	23	24	25	26	27	28	29	30	31	32	33	34	35	36	37	38	39	40	41	42	43	44	45	46	47
	1																																				1							1
	2
	3																																							1
	4																																		1
	5
	6
	7																																																1
	8																																				1	1		1		1
	9
	10
	11																																								1	1
	12																																													1	1	1	1
	13
	14																																				1	1		1
	15
	16
	SUM		0	0	0	0	0	0	0	0	0	0	0	0	0	0	0	0	0	0	0	0	0	0	0	0	0	0	0	0	0	0	0	0	1	0	3	2	0	3	1	2	0	1	0	1	1	1	2
	%		0	0	0	0	0	0	0	0	0	0	0	0	0	0	0	0	0	0	0	0	0	0	0	0	0	0	0	0	0	0	0	0	6.25	0	18.75	12.5	0	18.75	6.25	12.5	0	6.25	0	6.25	6.25	6.25	12.5
	#		60E02/CsChrimson UAS-Cas9 sarm#2 before injury
			1	2	3	4	5	6	7	8	9	10	11	12	13	14	15	16	17	18	19	20	21	22	23	24	25	26	27	28	29	30	31	32	33	34	35	36	37	38	39	40	41	42	43	44	45	46	47
	1																																1	1	1	1	1	1	1	1	1	1
	2																																1	1	1	1	1		1	1	1	1	1
	3																																1	1	1	1		1		1	1	1
	4																																1	1	1	1	1			1	1			1
	5																																1	1	1
	6																																1	1	1	1			1	1	1
	7																																	1	1	1	1	1	1	1	1	1		1	1
	8																																	1	1	1	1	1	1										1
	9																																1	1	1	1	1			1	1
	10																																1	1	1	1		1	1	1			1
	11																																1	1	1	1	1		1		1
	12																																1	1	1	1
	13																																	1			1	1		1	1
	14																																	1	1	1		1				1
	15																																	1	1	1	1	1	1	1	1	1		1
	SUM		0	0	0	0	0	0	0	0	0	0	0	0	0	0	0	0	0	0	0	0	0	0	0	0	0	0	0	0	0	0	10	15	14	13	9	8	8	10	10	6	2	3	1	0	0	0	1
	%		0	0	0	0	0	0	0	0	0	0	0	0	0	0	0	0	0	0	0	0	0	0	0	0	0	0	0	0	0	0	66.6667	100	93.3333	86.6667	60	53.3333	53.3333	66.6667	66.6667	40	13.3333	20	6.66667	0	0	0	6.66667
	#		60E02/CsChrimson UAS-Cas9 sarm#2 7dpi
			1	2	3	4	5	6	7	8	9	10	11	12	13	14	15	16	17	18	19	20	21	22	23	24	25	26	27	28	29	30	31	32	33	34	35	36	37	38	39	40	41	42	43	44	45	46	47
	1
	2																																1	1			1	1	1
	3																																		1
	4
	5
	6																																				1	1
	7
	8																																									1
	9
	10																																					1	1	1
	11																																						1
	12
	13																																							1	1
	14
	15
	SUM		0	0	0	0	0	0	0	0	0	0	0	0	0	0	0	0	0	0	0	0	0	0	0	0	0	0	0	0	0	0	1	1	1	0	2	3	3	2	1	1	0	0	0	0	0	0	0
	%		0	0	0	0	0	0	0	0	0	0	0	0	0	0	0	0	0	0	0	0	0	0	0	0	0	0	0	0	0	0	6.66667	6.66667	6.66667	0	13.3333	20	20	13.3333	6.66667	6.66667	0	0	0	0	0	0	0
	#		60E02/CsChrimson UAS-Cas9 hiw#1 before injury
			1	2	3	4	5	6	7	8	9	10	11	12	13	14	15	16	17	18	19	20	21	22	23	24	25	26	27	28	29	30	31	32	33	34	35	36	37	38	39	40	41	42	43	44	45	46	47
	1																																1	1	1	1	1		1		1		1	1	1	1	1
	2																																1	1	1	1	1			1	1		1	1	1	1	1
	3																																1	1	1				1	1	1
	4																																1	1
	5																																1	1	1	1	1			1	1	1
	6																																1	1	1	1	1	1	1	1	1	1
	7																																1	1	1
	8																																	1	1	1		1	1		1	1
	9																																1	1		1	1	1		1
	10																																1	1	1			1
	11																																1	1				1	1	1			1
	12																																1	1	1	1	1	1	1	1	1	1	1
	SUM		0	0	0	0	0	0	0	0	0	0	0	0	0	0	0	0	0	0	0	0	0	0	0	0	0	0	0	0	0	0	11	12	9	7	6	6	6	7	7	4	4	2	2	2	2	0	0
	%		0	0	0	0	0	0	0	0	0	0	0	0	0	0	0	0	0	0	0	0	0	0	0	0	0	0	0	0	0	0	91.6667	100	75	58.3333	50	50	50	58.3333	58.3333	33.3333	33.3333	16.6667	16.6667	16.6667	16.6667	0	0
	#		60E02/CsChrimson UAS-Cas9 hiw#1 7dpi
			1	2	3	4	5	6	7	8	9	10	11	12	13	14	15	16	17	18	19	20	21	22	23	24	25	26	27	28	29	30	31	32	33	34	35	36	37	38	39	40	41	42	43	44	45	46	47
	1
	2
	3																																	1					1	1
	4
	5
	6
	7																																						1	1	1	1
	8																																													1
	9
	10																																							1		1
	11																																	1	1				1	1	1
	12
	SUM		0	0	0	0	0	0	0	0	0	0	0	0	0	0	0	0	0	0	0	0	0	0	0	0	0	0	0	0	0	0	0	2	1	0	0	0	3	4	2	2	0	0	0	1	0	0	0
	%		0	0	0	0	0	0	0	0	0	0	0	0	0	0	0	0	0	0	0	0	0	0	0	0	0	0	0	0	0	0	0	16.6667	8.33333	0	0	0	25	33.3333	16.6667	16.6667	0	0	0	8.33333	0	0	0
	#		60E02/CsChrimson UAS-Cas9 axed before injury
			1	2	3	4	5	6	7	8	9	10	11	12	13	14	15	16	17	18	19	20	21	22	23	24	25	26	27	28	29	30	31	32	33	34	35	36	37	38	39	40	41	42	43	44	45	46	47
	1																																1	1		1	1	1	1	1					1				1
	2																																1	1	1	1	1	1	1	1	1	1		1
	3																																	1	1	1			1
	4																																1	1				1	1	1
	5																																1	1	1
	6																																	1
	7																																1	1	1											1	1	1	1
	8																																	1	1					1	1	1
	9																																	1		1	1	1	1
	10																																1	1
	11																																1	1					1	1	1	1
	12																																	1	1	1		1
	13																																1	1	1	1	1	1
	14																																1	1	1		1		1		1
	15																																1	1	1	1			1	1	1	1		1
	16																																	1	1	1					1			1	1	1	1	1
	SUM		0	0	0	0	0	0	0	0	0	0	0	0	0	0	0	0	0	0	0	0	0	0	0	0	0	0	0	0	0	0	10	16	10	8	5	6	8	6	6	4	0	3	2	2	2	2	2
	%		0	0	0	0	0	0	0	0	0	0	0	0	0	0	0	0	0	0	0	0	0	0	0	0	0	0	0	0	0	0	62.5	100	62.5	50	31.25	37.5	50	37.5	37.5	25	0	18.75	12.5	12.5	12.5	12.5	12.5
	#		60E02/CsChrimson UAS-Cas9 axed 7dpi
			1	2	3	4	5	6	7	8	9	10	11	12	13	14	15	16	17	18	19	20	21	22	23	24	25	26	27	28	29	30	31	32	33	34	35	36	37	38	39	40	41	42	43	44	45	46	47
	1
	2
	3
	4
	5																																											1
	6
	7
	8																																												1	1	1	1	1
	9
	10
	11																																		1		1
	12
	13																																			1	1		1	1	1
	14																																	1	1
	15																																												1	1	1	1
	16
	SUM		0	0	0	0	0	0	0	0	0	0	0	0	0	0	0	0	0	0	0	0	0	0	0	0	0	0	0	0	0	0	0	1	2	1	2	0	1	1	1	0	0	1	2	2	2	2	1
	%		0	0	0	0	0	0	0	0	0	0	0	0	0	0	0	0	0	0	0	0	0	0	0	0	0	0	0	0	0	0	0	6.25	12.5	6.25	12.5	0	6.25	6.25	6.25	0	0	6.25	12.5	12.5	12.5	12.5	6.25
[truncated: 83 more columns]

## Sheet: UAS-Cas9_Raw_data
	Quantification grooming
	#		60E02/CsChrimson UAS-Cas9 ctrl before injury
			1	2	3	4	5	6	7	8	9	10	11	12	13	14	15	16	17	18	19	20	21	22	23	24	25	26	27	28	29	30	31	32	33	34	35	36	37	38	39	40	41	42	43	44	45	46	47
	1																																1	1	1		1	1	1	1	1	1
	2																															1	1	1		1	1				1	1	1	1	1
	3																															1	1	1
	4																															1	1	1	1			1		1	1	1
	5																																1	1	1	1	1	1		1	1
	6																															1	1	1		1	1		1	1					1		1	1	1
	7																																				1	1	1	1	1
	8																																1	1	1	1				1		1
	9																															1	1	1	1	1	1	1	1	1	1
	10																																1	1	1	1	1			1
	11																															1	1	1	1	1	1	1	1	1	1
	12																														1	1	1	1	1	1			1	1
	13																															1	1	1	1	1	1	1	1	1
	14																																1	1	1	1												1
	15																																	1		1	1			1	1
	16																															1	1	1	1	1	1		1	1	1	1
	SUM		0	0	0	0	0	0	0	0	0	0	0	0	0	0	0	0	0	0	0	0	0	0	0	0	0	0	0	0	1	9	14	15	11	12	11	7	8	13	9	5	1	1	2	0	1	2	1
	%		0	0	0	0	0	0	0	0	0	0	0	0	0	0	0	0	0	0	0	0	0	0	0	0	0	0	0	0	6.25	56.25	87.5	93.75	68.75	75	68.75	43.75	50	81.25	56.25	31.25	6.25	6.25	12.5	0	6.25	12.5	6.25
	#		60E02/CsChrimson UAS-Cas9 ctrl 7dpi
			1	2	3	4	5	6	7	8	9	10	11	12	13	14	15	16	17	18	19	20	21	22	23	24	25	26	27	28	29	30	31	32	33	34	35	36	37	38	39	40	41	42	43	44	45	46	47
	1																																			1							1
	2
	3																																					1
	4																																	1
	5
	6
	7																																															1
	8																																				1	1		1		1
	9
	10
	11																																								1	1
	12																																													1	1	1	1
	13
	14																																				1	1		1
	15
	16
	SUM		0	0	0	0	0	0	0	0	0	0	0	0	0	0	0	0	0	0	0	0	0	0	0	0	0	0	0	0	0	0	0	1	0	1	2	3	0	2	1	2	1	0	0	1	1	2	1
	%		0	0	0	0	0	0	0	0	0	0	0	0	0	0	0	0	0	0	0	0	0	0	0	0	0	0	0	0	0	0	0	6.25	0	6.25	12.5	18.75	0	12.5	6.25	12.5	6.25	0	0	6.25	6.25	12.5	6.25
	#		60E02/CsChrimson UAS-Cas9 sarm#2 before injury
			1	2	3	4	5	6	7	8	9	10	11	12	13	14	15	16	17	18	19	20	21	22	23	24	25	26	27	28	29	30	31	32	33	34	35	36	37	38	39	40	41	42	43	44	45	46	47
	1																																1	1	1	1	1	1	1	1	1	1
	2																																1	1	1	1	1		1	1	1	1	1
	3																																1	1	1	1		1		1	1	1
	4																																1	1	1	1	1			1	1			1
	5																															1	1	1
	6																																	1	1	1	1			1	1	1
	7																																1	1	1	1	1	1		1	1	1	1	1
	8																																1	1	1	1	1	1										1	1
	9																															1	1	1	1	1			1	1
	10																															1	1	1	1		1	1	1		1
	11																																1	1	1	1	1		1		1
	12																																1	1	1	1
	13																															1			1	1		1	1
	14																																1	1	1		1					1
	15																																1	1	1	1	1	1	1		1	1	1
	SUM		0	0	0	0	0	0	0	0	0	0	0	0	0	0	0	0	0	0	0	0	0	0	0	0	0	0	0	0	0	4	13	14	14	12	10	7	7	7	9	7	3	2	0	0	0	1	1
	%		0	0	0	0	0	0	0	0	0	0	0	0	0	0	0	0	0	0	0	0	0	0	0	0	0	0	0	0	0	26.6667	86.6667	93.3333	93.3333	80	66.6667	46.6667	46.6667	46.6667	60	46.6667	20	13.3333	0	0	0	6.66667	6.66667
	#		60E02/CsChrimson UAS-Cas9 sarm#2 7dpi
			1	2	3	4	5	6	7	8	9	10	11	12	13	14	15	16	17	18	19	20	21	22	23	24	25	26	27	28	29	30	31	32	33	34	35	36	37	38	39	40	41	42	43	44	45	46	47
	1
	2																																1	1			1	1	1
	3																																	1
	4
	5
	6																																			1	1
	7
	8																																									1
	9
	10																																	1	1	1
	11																																						1
	12
	13																																							1	1
	14
	15
	SUM		0	0	0	0	0	0	0	0	0	0	0	0	0	0	0	0	0	0	0	0	0	0	0	0	0	0	0	0	0	0	1	3	1	2	2	1	2	1	1	1	0	0	0	0	0	0	0
	%		0	0	0	0	0	0	0	0	0	0	0	0	0	0	0	0	0	0	0	0	0	0	0	0	0	0	0	0	0	0	6.66667	20	6.66667	13.3333	13.3333	6.66667	13.3333	6.66667	6.66667	6.66667	0	0	0	0	0	0	0
	#		60E02/CsChrimson UAS-Cas9 hiw#1 before injury
			1	2	3	4	5	6	7	8	9	10	11	12	13	14	15	16	17	18	19	20	21	22	23	24	25	26	27	28	29	30	31	32	33	34	35	36	37	38	39	40	41	42	43	44	45	46	47
	1																															1	1	1	1	1		1		1	1	1	1	1	1
	2																															1	1	1	1	1			1	1	1	1	1	1	1
	3																																1	1	1				1	1	1
	4																															1	1
	5																															1	1	1	1	1			1	1	1
	6																																1	1	1		1	1	1	1	1	1	1
	7																															1	1	1
	8																																1	1	1		1	1		1	1
	9																																1	1		1	1	1		1
	10																																1	1	1			1
	11																																			1	1				1	1	1		1
	12																																1	1	1	1	1	1	1	1	1	1	1
	SUM		0	0	0	0	0	0	0	0	0	0	0	0	0	0	0	0	0	0	0	0	0	0	0	0	0	0	0	0	0	5	11	10	8	6	5	6	5	8	8	5	5	2	3	0	0	0	0
	%		0	0	0	0	0	0	0	0	0	0	0	0	0	0	0	0	0	0	0	0	0	0	0	0	0	0	0	0	0	41.6667	91.6667	83.3333	66.6667	50	41.6667	50	41.6667	66.6667	66.6667	41.6667	41.6667	16.6667	25	0	0	0	0
	#		60E02/CsChrimson UAS-Cas9 hiw#1 7dpi
			1	2	3	4	5	6	7	8	9	10	11	12	13	14	15	16	17	18	19	20	21	22	23	24	25	26	27	28	29	30	31	32	33	34	35	36	37	38	39	40	41	42	43	44	45	46	47
	1
	2
	3																															1					1	1											1
	4
	5
	6
	7																																					1	1	1	1
	8																																													1
	9
	10																																					1		1
	11																															1	1				1	1	1
	12
	SUM		0	0	0	0	0	0	0	0	0	0	0	0	0	0	0	0	0	0	0	0	0	0	0	0	0	0	0	0	0	2	1	0	0	0	2	4	2	2	1	0	0	0	0	1	0	0	1
	%		0	0	0	0	0	0	0	0	0	0	0	0	0	0	0	0	0	0	0	0	0	0	0	0	0	0	0	0	0	16.6667	8.33333	0	0	0	16.6667	33.3333	16.6667	16.6667	8.33333	0	0	0	0	8.33333	0	0	8.33333
	#		60E02/CsChrimson UAS-Cas9 axed before injury
			1	2	3	4	5	6	7	8	9	10	11	12	13	14	15	16	17	18	19	20	21	22	23	24	25	26	27	28	29	30	31	32	33	34	35	36	37	38	39	40	41	42	43	44	45	46	47
	1																																1	1		1	1	1	1	1					1				1
	2																																1	1	1	1	1	1	1	1	1	1	1
	3																																1	1	1			1
	4																																1	1				1	1	1
	5																																1	1	1
	6																																1
	7																																1	1	1											1	1	1	1
	8																																1	1						1	1	1
	9																																	1		1	1	1	1
	10																																1	1
	11																																1	1					1	1	1	1
	12																																1	1	1		1
	13																																	1	1	1	1	1	1
	14																																1	1	1		1		1		1
	15																																1	1	1	1			1	1	1	1	1
	16																																1	1	1					1		1	1	1	1	1
	SUM		0	0	0	0	0	0	0	0	0	0	0	0	0	0	0	0	0	0	0	0	0	0	0	0	0	0	0	0	0	0	14	15	9	5	6	6	8	7	5	5	3	1	2	2	1	1	2
	%		0	0	0	0	0	0	0	0	0	0	0	0	0	0	0	0	0	0	0	0	0	0	0	0	0	0	0	0	0	0	87.5	93.75	56.25	31.25	37.5	37.5	50	43.75	31.25	31.25	18.75	6.25	12.5	12.5	6.25	6.25	12.5
	#		60E02/CsChrimson UAS-Cas9 axed 7dpi
			1	2	3	4	5	6	7	8	9	10	11	12	13	14	15	16	17	18	19	20	21	22	23	24	25	26	27	28	29	30	31	32	33	34	35	36	37	38	39	40	41	42	43	44	45	46	47
	1
	2
	3
	4
	5																																										1
	6
	7
	8																																												1	1	1	1	1
	9
	10
	11																																		1		1
	12
	13																																		1	1		1	1	1
	14																																	1	1
	15																																												1	1	1	1
	16
	SUM		0	0	0	0	0	0	0	0	0	0	0	0	0	0	0	0	0	0	0	0	0	0	0	0	0	0	0	0	0	0	0	1	3	1	1	1	1	1	0	0	1	0	2	2	2	2	1
	%		0	0	0	0	0	0	0	0	0	0	0	0	0	0	0	0	0	0	0	0	0	0	0	0	0	0	0	0	0	0	0	6.25	18.75	6.25	6.25	6.25	6.25	6.25	0	0	6.25	0	12.5	12.5	12.5	12.5	6.25
[truncated: 83 more columns]
