# Supplementary material for: The NAD+ precursor NMN activates dSarm to trigger axon degeneration in Drosophila
Source: eLife journal article supplement (doi:10.7554/elife.80245), 2022-12-07
Supplement: fig6-figsupp1-data1 [file 6 S1D F tc.xlsx]

## Sheet: Sheet1
wt (3R)	nmnat1	sgnmnat	NMN deamidase + sgnmnat
6	5	9	6
6	7	11	7
7	2	7	8
8	3	9	13
5	8	9	11
12	6	9	3
13	3	7	7
7	8	7	7
6	4	12	7
4	7	10	10
6	3	4	9
9	2	2	10
4	4	4	9
6	0	5	9
5	2	6	5
3	1	2	7
10	3	4	7
7	3	4	7
7	0	6	6
8	2	6	9
8	2	1	8
7	2	4	11
13	2	2	11
8	2	3	10
8	2	2	7
6	0	3	9
3	6	1	4
8	3	4	10
7	1	2	6
4	1	2	12
4	0	1	9
6	0	2	5
8	1	4	3
13	0	2	9
9	2	3	10
4	1	0	5
8	2	2	6
4	1	2	12
8	0	3	9
6	1	0	12
6	0	1	4
9	0	0	9
4	0	0	9
7	0	1	6
9	0	2	8
7	0	1	2
5	0	0	5
6	0	0	6
10	0	1	3
10	0	1	5
	0	0	3
	0	0	6
	0	0	4
	0	0	5
	0	0	5
	0	0	4
	0	0	3
	0	0	4
	0	0	7
	0	0	5
	0	0	2
	0	0	2
	0	0	1
	0	0	1
	0	0	2
	0	0	3
	0	0	2
	0	0	2
	0	0	3
	0	0	1
	0	0	3
	0	0	4
	0	0	0
	0	0	3
	0	0	1
	0	0	2
	0	0	1
	0	0	2
	0	0	3
	0	0	0
	0	0	0
	0	0	2
	0	0	0
	0	0	4
	0	0	2
	0	0	0
	0	0	1
	0	0	1
	0	0	1
	0	0	1
	0	0	0
	0	0	0
	0	0	0
	0	0	0
	0	0	0
	0	0	1
	0	0	0
	0	0	1
	0	0	1
	0	0	2
