# Supplementary material for: The NAD+ precursor NMN activates dSarm to trigger axon degeneration in Drosophila
Source: eLife journal article supplement (doi:10.7554/elife.80245), 2022-12-07
Supplement: fig6-figsupp1-data1 [file 6 S1E opto.xlsx]

## Sheet: Time_course_Nmnat_guide
	Quantification grooming
	Conditions: 7-14 days old animals intensity 6 mW/cm2
	#		60E02/CsChrimson ctrl UAS-CAS9 7 days old
			1	2	3	4	5	6	7	8	9	10	11	12	13	14	15	16	17	18	19	20	21	22	23	24	25	26	27	28	29	30	31	32	33	34	35	36	37	38	39	40	41	42	43	44	45	46	47
	1																																	1	1				1	1
	2																																1	1	1								1
	3																																		1	1	1				1
	4																																	1	1
	5																																		1	1	1	1		1	1
	6																																	1	1	1	1	1	1	1	1		1
	7																																	1	1	1	1	1	1	1	1
	8																																1	1	1	1	1		1
	9																																1	1	1	1	1	1		1		1
	10																																1	1	1	1	1				1
	11																																1	1	1	1	1	1
	12																																1	1	1	1	1	1	1	1		1
	13																																	1	1	1	1		1	1		1	1
	14																																1	1	1	1	1	1	1	1	1
	15																																	1	1	1		1			1
	SUM		0	0	0	0	0	0	0	0	0	0	0	0	0	0	0	0	0	0	0	0	0	0	0	0	0	0	0	0	0	0	7	13	15	12	11	8	7	8	7	3	3	0	0	0	0	0	0
	%		0	0	0	0	0	0	0	0	0	0	0	0	0	0	0	0	0	0	0	0	0	0	0	0	0	0	0	0	0	0	46.6667	86.6667	100	80	73.3333	53.3333	46.6667	53.3333	46.6667	20	20	0	0	0	0	0	0
	#		60E02/CsChrimson UAS-Cas9 Nmnat guide 7 days old
			1	2	3	4	5	6	7	8	9	10	11	12	13	14	15	16	17	18	19	20	21	22	23	24	25	26	27	28	29	30	31	32	33	34	35	36	37	38	39	40	41	42	43	44	45	46	47
	1																																	1	1		1
	2																																1	1	1	1		1		1	1		1
	3																																	1	1	1		1			1		1
	4																																	1	1	1	1		1	1
	5																																1	1	1	1	1	1	1	1	1	1	1
	6																																1	1	1	1		1	1
	7																																	1	1	1	1		1
	8																																1	1	1	1
	9																																1	1	1
	10																																			1
	11																																	1										1
	12																																	1	1	1	1	1
	13																																1	1	1
	14																																	1	1
	15																																	1	1
	SUM		0	0	0	0	0	0	0	0	0	0	0	0	0	0	0	0	0	0	0	0	0	0	0	0	0	0	0	0	0	0	6	14	13	9	5	5	4	3	3	1	3	1	0	0	0	0	0
	%		0	0	0	0	0	0	0	0	0	0	0	0	0	0	0	0	0	0	0	0	0	0	0	0	0	0	0	0	0	0	40	93.3333	86.6667	60	33.3333	33.3333	26.6667	20	20	6.66667	20	6.66667	0	0	0	0	0
	#		60E02/CsChrimson ctrl UAS-CAS9 14 days old
			1	2	3	4	5	6	7	8	9	10	11	12	13	14	15	16	17	18	19	20	21	22	23	24	25	26	27	28	29	30	31	32	33	34	35	36	37	38	39	40	41	42	43	44	45	46	47
	1																																	1	1		1	1	1	1	1
	2																																1	1	1	1				1	1		1
	3																																1	1	1	1	1	1	1	1			1
	4																																	1		1	1	1	1	1
	5																																	1	1	1	1	1	1	1	1		1
	6																																1	1	1	1	1	1	1	1			1
	7																																1	1	1	1		1		1	1
	8																																1	1	1	1	1	1	1	1	1
	9																																1	1	1	1	1	1	1
	10																																1	1	1		1			1	1
	11																																	1	1
	12																																1	1
	13																																1	1	1	1	1	1	1	1	1		1
	14																																1	1	1	1	1	1	1	1	1	1
	15																																					1		1	1	1	1
	SUM		0	0	0	0	0	0	0	0	0	0	0	0	0	0	0	0	0	0	0	0	0	0	0	0	0	0	0	0	0	0	10	14	12	10	10	11	9	12	9	2	6	0	0	0	0	0	0
	%		0	0	0	0	0	0	0	0	0	0	0	0	0	0	0	0	0	0	0	0	0	0	0	0	0	0	0	0	0	0	66.6667	93.3333	80	66.6667	66.6667	73.3333	60	80	60	13.3333	40	0	0	0	0	0	0
	#		60E02/CsChrimson UAS-Cas9 Nmnat guide 14 days old
			1	2	3	4	5	6	7	8	9	10	11	12	13	14	15	16	17	18	19	20	21	22	23	24	25	26	27	28	29	30	31	32	33	34	35	36	37	38	39	40	41	42	43	44	45	46	47
	1																																	1		1
	2																																	1	1	1		1
	3																																1	1	1
	4																																	1				1		1			1	1
	5																																	1
	6
	7																																	1	1	1
	8																																1			1
	9																																	1
	10																																		1	1	1	1			1
	11																																1	1		1		1	1	1	1
	12																																1	1	1	1	1	1	1
	13																																1						1		1		1	1		1	1
	14																																				1	1	1	1	1
	15																																1
	SUM		0	0	0	0	0	0	0	0	0	0	0	0	0	0	0	0	0	0	0	0	0	0	0	0	0	0	0	0	0	0	6	9	5	7	3	6	4	3	4	0	2	2	0	1	1	0	0
	%		0	0	0	0	0	0	0	0	0	0	0	0	0	0	0	0	0	0	0	0	0	0	0	0	0	0	0	0	0	0	40	60	33.3333	46.6667	20	40	26.6667	20	26.6667	0	13.3333	13.3333	0	6.66667	6.66667	0	0
		total:								1st	2nd	3rd
		bins per 10 sec stimulus:
		UAS-Cas9 ctrl 7 days old								91	83	83
		UAS-Cas9&UAS-Nmnat 7 days old								63	70	72
		UAS-Cas9 ctrl 14 days old								99	96	84
		UAS-Cas9&UAS-Nmnat 14 days old								47	31	30
		bins per 10 sec stimulus per animal
		UAS-Cas9 ctrl 7 days old								6.06667	5.53333	5.53333
		UAS-Cas9&UAS-Nmnat 7 days old								4.2	4.66667	4.8
		UAS-Cas9 ctrl 14 days old								6.6	6.4	5.6
		UAS-Cas9&UAS-Nmnat 14 days old								3.13333	2.06667	2
		Average bins / animal / 10 sec stimulus:								avg	sd	sem
		UAS-Cas9 ctrl 7 days old								5.71111	0.30792	0.177778
		UAS-Cas9&UAS-Nmnat 7 days old								4.55556	0.315054	0.181897
		UAS-Cas9 ctrl 14 days old								6.2	0.52915	0.305505
		UAS-Cas9&UAS-Nmnat 14 days old								2.4	0.635959	0.367171
[truncated: 103 more columns]

## Sheet: Time_course_Nmnatg_Raw_data
	Quantification grooming
	Conditions: 7-14 days old animals intensity 6 mW/cm2
	#		60E02/CsChrimson ctrl UAS-CAS9 7 days old
			1	2	3	4	5	6	7	8	9	10	11	12	13	14	15	16	17	18	19	20	21	22	23	24	25	26	27	28	29	30	31	32	33	34	35	36	37	38	39	40	41	42	43	44	45	46	47
	1																																1	1				1	1
	2																															1	1	1							1
	3																																		1	1	1				1
	4																																1	1
	5																																		1	1	1	1		1	1
	6																																1	1	1	1	1	1	1	1	1
	7																																1	1	1	1	1	1	1	1
	8																															1	1	1	1	1		1
	9																															1	1	1	1	1	1		1		1
	10																																1	1	1	1	1				1
	11																															1	1	1	1	1	1
	12																															1	1	1	1	1	1	1	1		1
	13																																1	1	1	1		1	1		1	1
	14																																1	1	1	1	1	1	1	1	1
	15																																	1	1	1		1			1
	SUM		0	0	0	0	0	0	0	0	0	0	0	0	0	0	0	0	0	0	0	0	0	0	0	0	0	0	0	0	0	5	12	13	12	12	9	9	7	4	10	1	0	0	0	0	0	0	0
	%		0	0	0	0	0	0	0	0	0	0	0	0	0	0	0	0	0	0	0	0	0	0	0	0	0	0	0	0	0	33.3333	80	86.6667	80	80	60	60	46.6667	26.6667	66.6667	6.66667	0	0	0	0	0	0	0
	#		60E02/CsChrimson UAS-Cas9 Nmnat guide 7 days old
			1	2	3	4	5	6	7	8	9	10	11	12	13	14	15	16	17	18	19	20	21	22	23	24	25	26	27	28	29	30	31	32	33	34	35	36	37	38	39	40	41	42	43	44	45	46	47
	1																																	1	1		1
	2																																1	1	1	1		1		1	1	1
	3																																1	1	1		1			1	1
	4																																	1	1	1	1		1	1
	5																																1	1	1	1	1	1	1	1	1	1	1
	6																																1	1	1	1		1	1
	7																														1	1	1	1		1
	8																															1	1	1	1
	9																																1	1	1
	10																																		1
	11																																1										1
	12																																1	1	1	1	1
	13																															1	1	1
	14																															1	1
	15																																	1	1
	SUM		0	0	0	0	0	0	0	0	0	0	0	0	0	0	0	0	0	0	0	0	0	0	0	0	0	0	0	0	1	4	11	12	11	6	5	3	3	4	3	2	2	0	0	0	0	0	0
	%		0	0	0	0	0	0	0	0	0	0	0	0	0	0	0	0	0	0	0	0	0	0	0	0	0	0	0	0	6.66667	26.6667	73.3333	80	73.3333	40	33.3333	20	20	26.6667	20	13.3333	13.3333	0	0	0	0	0	0
	#		60E02/CsChrimson ctrl UAS-CAS9 14 days old
			1	2	3	4	5	6	7	8	9	10	11	12	13	14	15	16	17	18	19	20	21	22	23	24	25	26	27	28	29	30	31	32	33	34	35	36	37	38	39	40	41	42	43	44	45	46	47
	1																												1	1		1	1	1	1	1
	2																															1	1	1	1				1	1	1
	3																															1	1	1	1	1	1	1	1	1
	4																														1		1	1	1	1	1
	5																																1	1	1	1	1	1	1	1	1
	6																																	1	1	1	1	1	1	1	1	1
	7																																1	1	1	1		1		1	1
	8																															1	1	1	1	1	1	1	1	1
	9																																1	1	1	1	1	1	1
	10																																	1	1	1		1			1	1
	11																																1	1
	12																																	1	1
	13																																1	1	1	1	1	1	1	1	1	1
	14																																1	1	1	1	1	1	1	1	1	1
	15																																					1		1	1	1	1
	SUM		0	0	0	0	0	0	0	0	0	0	0	0	0	0	0	0	0	0	0	0	0	0	0	0	0	0	1	1	1	4	11	14	13	11	8	10	8	9	8	5	1	0	0	0	0	0	0
	%		0	0	0	0	0	0	0	0	0	0	0	0	0	0	0	0	0	0	0	0	0	0	0	0	0	0	6.66667	6.66667	6.66667	26.6667	73.3333	93.3333	86.6667	73.3333	53.3333	66.6667	53.3333	60	53.3333	33.3333	6.66667	0	0	0	0	0	0
	#		60E02/CsChrimson UAS-Cas9 Nmnat guide 14 days old
			1	2	3	4	5	6	7	8	9	10	11	12	13	14	15	16	17	18	19	20	21	22	23	24	25	26	27	28	29	30	31	32	33	34	35	36	37	38	39	40	41	42	43	44	45	46	47
	1																																	1		1
	2																																1	1	1		1
	3																														1	1	1
	4																																1				1		1		1	1
	5																																	1
	6
	7																																1	1	1
	8																																1			1
	9																															1
	10																																		1	1	1	1			1
	11																																1	1		1		1	1	1	1
	12																														1	1	1	1	1	1	1
	13																																1						1		1		1	1		1	1
	14																																			1	1	1	1	1
	15																															1
	SUM		0	0	0	0	0	0	0	0	0	0	0	0	0	0	0	0	0	0	0	0	0	0	0	0	0	0	0	0	2	4	8	6	4	6	5	3	4	2	4	1	1	1	0	1	1	0	0
	%		0	0	0	0	0	0	0	0	0	0	0	0	0	0	0	0	0	0	0	0	0	0	0	0	0	0	0	0	13.3333	26.6667	53.3333	40	26.6667	40	33.3333	20	26.6667	13.3333	26.6667	6.66667	6.66667	6.66667	0	6.66667	6.66667	0	0
		total:								1st	2nd	3rd
		bins per 10 sec stimulus:
		UAS-Cas9 ctrl 7 days old								89	74	59
		UAS-Cas9&UAS-Nmnat 7 days old								60	62	61
		UAS-Cas9 ctrl 14 days old								97	88	47
		UAS-Cas9&UAS-Nmnat 14 days old								43	29	13
		bins per 10 sec stimulus per animal
		UAS-Cas9 ctrl 7 days old								5.93333	4.93333	3.93333
		UAS-Cas9&UAS-Nmnat 7 days old								4	4.13333	4.06667
		UAS-Cas9 ctrl 14 days old								6.46667	5.86667	3.13333
		UAS-Cas9&UAS-Nmnat 14 days old								2.86667	1.93333	0.866667
		Average bins / animal / 10 sec stimulus:								avg	sd	sem
		UAS-Cas9 ctrl 7 days old								4.93333	1	0.57735
		UAS-Cas9&UAS-Nmnat 7 days old								4.06667	0.0666667	0.03849
		UAS-Cas9 ctrl 14 days old								5.15556	1.77681	1.02584
		UAS-Cas9&UAS-Nmnat 14 days old								1.88889	1.00074	0.577778
[truncated: 103 more columns]
