# Supplementary material for: The NAD+ precursor NMN activates dSarm to trigger axon degeneration in Drosophila
Source: eLife journal article supplement (doi:10.7554/elife.80245), 2022-12-07
Supplement: fig6-figsupp1-data1 [file elife-80245-fig6-figsupp1-data1-v2.zip]

## Sheet: Act-Cas9_adj_quant
	Quantification grooming
	#		60E02/CsChrimson ctrl before injury
			1	2	3	4	5	6	7	8	9	10	11	12	13	14	15	16	17	18	19	20	21	22	23	24	25	26	27	28	29	30	31	32	33	34	35	36	37	38	39	40	41	42	43	44	45	46	47
	1																																	1		1			1	1		1
	2																																1	1	1				1	1	1
	3																																1		1			1		1	1	1
	4																																		1	1	1	1	1	1	1	1	1
	5																																	1	1				1	1			1						1
	6																																1	1	1	1	1	1	1	1	1	1
	7																																1	1	1	1
	8																																	1	1	1	1		1	1		1
	9																																1	1	1		1	1		1	1		1
	10																																1	1	1	1	1	1		1					1	1	1	1	1
	11																																	1			1	1				1							1
	12																																1	1	1	1			1
	13																																1	1	1	1	1		1	1
	14																																	1	1	1	1	1						1
	15																																1	1	1	1					1	1
	16																																1	1	1			1	1	1		1	1
	17																																	1	1	1	1	1	1	1	1	1	1	1
	18																																1	1				1		1							1
	SUM		0	0	0	0	0	0	0	0	0	0	0	0	0	0	0	0	0	0	0	0	0	0	0	0	0	0	0	0	0	0	11	16	15	11	9	10	10	13	7	9	5	2	1	1	2	1	3
	%		0	0	0	0	0	0	0	0	0	0	0	0	0	0	0	0	0	0	0	0	0	0	0	0	0	0	0	0	0	0	61.1111	88.8889	83.3333	61.1111	50	55.5556	55.5556	72.2222	38.8889	50	27.7778	11.1111	5.55556	5.55556	11.1111	5.55556	16.6667
	#		60E02/CsChrimson ctrl 7dpi
			1	2	3	4	5	6	7	8	9	10	11	12	13	14	15	16	17	18	19	20	21	22	23	24	25	26	27	28	29	30	31	32	33	34	35	36	37	38	39	40	41	42	43	44	45	46	47
	1
	2																																							1
	3																																									1				1	1
	4																																			1			1
	5																																															1
	6
	7																																								1
	8																																										1
	9																																				1	1
	10																																													1		1
	11
	12
	13
	14
	15
	16
	17
	18																																			1							1		1		1	1	1
	SUM		0	0	0	0	0	0	0	0	0	0	0	0	0	0	0	0	0	0	0	0	0	0	0	0	0	0	0	0	0	0	0	0	0	2	1	1	1	1	1	1	2	0	1	2	2	3	1
	%		0	0	0	0	0	0	0	0	0	0	0	0	0	0	0	0	0	0	0	0	0	0	0	0	0	0	0	0	0	0	0	0	0	11.1111	5.55556	5.55556	5.55556	5.55556	5.55556	5.55556	11.1111	0	5.55556	11.1111	11.1111	16.6667	5.55556
	#		60E02/CsChrimson sarm#2 before
			1	2	3	4	5	6	7	8	9	10	11	12	13	14	15	16	17	18	19	20	21	22	23	24	25	26	27	28	29	30	31	32	33	34	35	36	37	38	39	40	41	42	43	44	45	46	47
	1																																1	1	1	1		1	1		1	1
	2																																	1						1
	3																																1	1	1		1	1	1	1	1	1			1	1	1	1	1
	4																																		1		1	1	1	1	1	1	1
	5																																	1	1	1	1			1
	6																																1	1	1	1		1		1	1
	7												1																					1		1	1
	8																																	1	1	1	1	1		1	1	1	1	1	1
	9																																1	1	1	1	1		1	1		1		1	1	1		1
	10																																	1	1				1									1
	11																																	1		1	1
	12																																1	1	1	1	1	1	1	1	1
	13																																1	1	1	1				1	1		1
	14																																1	1	1	1	1	1	1	1	1		1	1
	15																																1	1	1	1	1	1	1		1
	16																																	1	1	1	1	1	1	1	1	1	1
	SUM		0	0	0	0	0	0	0	0	0	0	1	0	0	0	0	0	0	0	0	0	0	0	0	0	0	0	0	0	0	0	8	15	13	12	11	9	9	11	10	6	5	3	3	2	1	3	1
	%		0	0	0	0	0	0	0	0	0	0	6.25	0	0	0	0	0	0	0	0	0	0	0	0	0	0	0	0	0	0	0	50	93.75	81.25	75	68.75	56.25	56.25	68.75	62.5	37.5	31.25	18.75	18.75	12.5	6.25	18.75	6.25
	#		60E02/CsChrimson sarm#2 7dpi
			1	2	3	4	5	6	7	8	9	10	11	12	13	14	15	16	17	18	19	20	21	22	23	24	25	26	27	28	29	30	31	32	33	34	35	36	37	38	39	40	41	42	43	44	45	46	47
	1																																1	1	1	1	1			1	1	1					1
	2																																		1	1			1	1	1	1		1			1	1	1
	3																																		1	1	1	1	1	1		1	1	1
	4																																						1
	5																																		1	1		1	1	1		1	1						1
	6																																1	1	1	1	1	1	1	1	1	1			1	1	1	1	1
	7																																	1
	8																																	1			1	1		1				1
	9																																1	1	1	1	1	1	1	1	1	1		1	1	1	1
	10																																1	1	1		1					1	1	1	1	1	1	1
	11
	12																																	1	1	1	1	1		1			1		1	1	1	1	1
	13																																1	1	1	1	1	1		1	1			1				1
	14																																1	1					1	1		1
	15																																	1
	16																																1	1	1	1	1	1	1	1	1	1	1	1
	SUM		0	0	0	0	0	0	0	0	0	0	0	0	0	0	0	0	0	0	0	0	0	0	0	0	0	0	0	0	0	0	7	11	10	9	9	8	8	11	6	9	5	7	4	4	6	5	4
	%		0	0	0	0	0	0	0	0	0	0	0	0	0	0	0	0	0	0	0	0	0	0	0	0	0	0	0	0	0	0	43.75	68.75	62.5	56.25	56.25	50	50	68.75	37.5	56.25	31.25	43.75	25	25	37.5	31.25	25
	#		60E02/CsChrimson hiw#1 before
			1	2	3	4	5	6	7	8	9	10	11	12	13	14	15	16	17	18	19	20	21	22	23	24	25	26	27	28	29	30	31	32	33	34	35	36	37	38	39	40	41	42	43	44	45	46	47
	1																																	1	1	1						1	1
	2																																1	1	1						1	1	1
	3																																	1	1	1	1	1		1	1	1	1
	4																																1
	5																																	1	1	1	1	1			1	1		1	1
	6																																1	1		1		1		1	1		1	1
	7																																1	1	1	1	1			1		1	1	1	1
	8																																	1	1
	9																																1	1	1	1	1	1	1		1		1
	10																																1	1	1	1		1	1	1	1	1	1
	11																																1	1	1	1	1					1	1
	12																																1	1	1	1	1	1	1	1	1	1
	SUM		0	0	0	0	0	0	0	0	0	0	0	0	0	0	0	0	0	0	0	0	0	0	0	0	0	0	0	0	0	0	8	11	10	9	6	6	3	5	7	8	8	3	2	0	0	0	0
	%		0	0	0	0	0	0	0	0	0	0	0	0	0	0	0	0	0	0	0	0	0	0	0	0	0	0	0	0	0	0	66.6667	91.6667	83.3333	75	50	50	25	41.6667	58.3333	66.6667	66.6667	25	16.6667	0	0	0	0
	#		60E02/CsChrimson hiw#1 7dpi
			1	2	3	4	5	6	7	8	9	10	11	12	13	14	15	16	17	18	19	20	21	22	23	24	25	26	27	28	29	30	31	32	33	34	35	36	37	38	39	40	41	42	43	44	45	46	47
	1																																				1			1	1	1	1
	2
	3																																1	1	1		1			1	1	1
	4																																1	1							1
	5																																1	1	1	1	1	1			1		1
	6																																	1	1	1
	7																																	1			1
	8
	9																																1	1	1	1	1	1	1	1	1	1	1
	10																																	1	1		1
	11																																1	1	1	1	1	1	1	1	1	1	1	1
	12																																1	1
	SUM		0	0	0	0	0	0	0	0	0	0	0	0	0	0	0	0	0	0	0	0	0	0	0	0	0	0	0	0	0	0	6	9	6	4	7	3	2	4	6	4	4	1	0	0	0	0	0
	%		0	0	0	0	0	0	0	0	0	0	0	0	0	0	0	0	0	0	0	0	0	0	0	0	0	0	0	0	0	0	50	75	50	33.3333	58.3333	25	16.6667	33.3333	50	33.3333	33.3333	8.33333	0	0	0	0	0
	#		60E02/CsChrimson axed before
			1	2	3	4	5	6	7	8	9	10	11	12	13	14	15	16	17	18	19	20	21	22	23	24	25	26	27	28	29	30	31	32	33	34	35	36	37	38	39	40	41	42	43	44	45	46	47
	1																																	1	1		1	1			1	1		1	1	1	1
	2																																1	1
	3																																1	1		1					1	1
	4																																	1	1				1	1	1		1		1	1	1	1	1
	5																																	1	1	1	1	1
	6																																1	1								1		1	1	1	1	1	1
	7																																	1	1	1
	8																																	1	1	1	1	1			1		1
	9																																	1	1	1		1			1	1
	10																																	1	1	1											1	1	1
	11																																1	1	1		1		1	1	1	1		1	1	1		1	1
	12																																1	1	1	1
	13																																1	1	1	1	1			1
	SUM		0	0	0	0	0	0	0	0	0	0	0	0	0	0	0	0	0	0	0	0	0	0	0	0	0	0	0	0	0	0	6	13	10	8	5	4	2	3	6	5	2	3	4	4	4	4	4
	%		0	0	0	0	0	0	0	0	0	0	0	0	0	0	0	0	0	0	0	0	0	0	0	0	0	0	0	0	0	0	46.1538	100	76.9231	61.5385	38.4615	30.7692	15.3846	23.0769	46.1538	38.4615	15.3846	23.0769	30.7692	30.7692	30.7692	30.7692	30.7692
	#		60E02/CsChrimson axed 7dpi
			1	2	3	4	5	6	7	8	9	10	11	12	13	14	15	16	17	18	19	20	21	22	23	24	25	26	27	28	29	30	31	32	33	34	35	36	37	38	39	40	41	42	43	44	45	46	47
	1
	2
	3
	4
	5																																	1		1		1	1	1	1
	6																																				1
	7
	8																											1
	9																																													1
	10																																											1	1	1	1	1
	11
	12																											1															1	1				1	1
	13																																			1		1	1					1
	SUM		0	0	0	0	0	0	0	0	0	0	0	0	0	0	0	0	0	0	0	0	0	0	0	0	0	2	0	0	0	0	0	1	0	2	1	2	2	1	1	0	1	3	1	2	1	2	1
	%		0	0	0	0	0	0	0	0	0	0	0	0	0	0	0	0	0	0	0	0	0	0	0	0	0	15.3846	0	0	0	0	0	7.69231	0	15.3846	7.69231	15.3846	15.3846	7.69231	7.69231	0	7.69231	23.0769	7.69231	15.3846	7.69231	15.3846	7.69231
[truncated: 86 more columns]

## Sheet: Act-Cas9_Raw_data
	Quantification grooming
	#		60E02/CsChrimson ctrl before injury
			1	2	3	4	5	6	7	8	9	10	11	12	13	14	15	16	17	18	19	20	21	22	23	24	25	26	27	28	29	30	31	32	33	34	35	36	37	38	39	40	41	42	43	44	45	46	47
	1																																		1		1			1	1		1
	2																																1	1	1				1	1	1
	3																																1		1			1		1	1	1
	4																																		1	1	1	1	1	1	1	1	1
	5																																1	1				1	1			1						1
	6																															1	1	1	1	1	1	1	1	1	1
	7																														1	1	1	1
	8																																	1	1	1	1			1	1		1
	9																															1	1	1		1	1		1	1	1
	10																																1	1	1	1	1	1		1					1	1	1	1	1
	11																																1			1	1					1						1	1
	12																																1	1	1	1			1
	13																														1	1	1	1	1		1	1
	14																															1	1	1	1	1						1
	15																														1	1	1	1						1	1
	16																															1	1	1			1	1	1		1	1
	17																															1	1	1	1	1	1	1	1	1	1	1
	18																															1	1				1		1							1
	SUM		0	0	0	0	0	0	0	0	0	0	0	0	0	0	0	0	0	0	0	0	0	0	0	0	0	0	0	0	3	9	15	13	11	9	11	8	9	10	10	7	3	0	1	2	1	3	2
	%		0	0	0	0	0	0	0	0	0	0	0	0	0	0	0	0	0	0	0	0	0	0	0	0	0	0	0	0	16.6667	50	83.3333	72.2222	61.1111	50	61.1111	44.4444	50	55.5556	55.5556	38.8889	16.6667	0	5.55556	11.1111	5.55556	16.6667	11.1111
	#		60E02/CsChrimson ctrl 7dpi
			1	2	3	4	5	6	7	8	9	10	11	12	13	14	15	16	17	18	19	20	21	22	23	24	25	26	27	28	29	30	31	32	33	34	35	36	37	38	39	40	41	42	43	44	45	46	47
	1
	2																																					1
	3																																									1			1	1
	4																																			1			1
	5																																																1
	6
	7																																								1
	8																																									1
	9																																			1	1
	10																																														1		1
	11
	12
	13
	14
	15
	16
	17
	18																																			1							1		1		1	1	1
	SUM		0	0	0	0	0	0	0	0	0	0	0	0	0	0	0	0	0	0	0	0	0	0	0	0	0	0	0	0	0	0	0	0	0	3	1	1	1	0	1	2	1	0	2	1	2	1	3
	%		0	0	0	0	0	0	0	0	0	0	0	0	0	0	0	0	0	0	0	0	0	0	0	0	0	0	0	0	0	0	0	0	0	16.6667	5.55556	5.55556	5.55556	0	5.55556	11.1111	5.55556	0	11.1111	5.55556	11.1111	5.55556	16.6667
	#		60E02/CsChrimson sarm#2 before
			1	2	3	4	5	6	7	8	9	10	11	12	13	14	15	16	17	18	19	20	21	22	23	24	25	26	27	28	29	30	31	32	33	34	35	36	37	38	39	40	41	42	43	44	45	46	47
	1																																1	1	1	1		1	1		1	1
	2																																	1						1
	3																																1	1	1		1	1	1	1	1	1		1	1	1	1	1	1
	4																																		1		1	1	1	1	1	1	1
	5																																	1	1	1	1			1
	6																																1	1	1	1		1		1	1
	7												1																					1		1	1
	8																																1	1	1	1	1		1	1	1	1	1	1
	9																															1	1	1	1	1		1	1		1		1	1	1		1
	10																																1	1				1									1
	11																																1		1	1
	12																																1	1	1	1	1	1	1	1	1
	13																															1	1	1	1				1	1		1
	14																													1	1	1	1	1	1	1	1	1	1	1
	15																															1	1	1	1	1	1	1		1
	16																															1	1	1	1	1	1	1	1	1	1
	SUM		0	0	0	0	0	0	0	0	0	0	1	0	0	0	0	0	0	0	0	0	0	0	0	0	0	0	0	1	1	5	12	14	13	11	9	10	9	11	8	5	3	3	2	1	3	1	1
	%		0	0	0	0	0	0	0	0	0	0	6.25	0	0	0	0	0	0	0	0	0	0	0	0	0	0	0	0	6.25	6.25	31.25	75	87.5	81.25	68.75	56.25	62.5	56.25	68.75	50	31.25	18.75	18.75	12.5	6.25	18.75	6.25	6.25
	#		60E02/CsChrimson sarm#2 7dpi
			1	2	3	4	5	6	7	8	9	10	11	12	13	14	15	16	17	18	19	20	21	22	23	24	25	26	27	28	29	30	31	32	33	34	35	36	37	38	39	40	41	42	43	44	45	46	47
	1																																1	1	1	1	1			1	1	1					1
	2																																	1	1			1	1	1	1		1			1	1	1	1
	3																																		1	1	1	1	1	1		1	1	1
	4																																					1
	5																																	1	1		1	1	1		1	1						1
	6																																1	1	1	1	1	1	1	1	1	1		1	1	1	1	1	1
	7																																1
	8																																	1			1	1		1				1
	9																																1	1	1	1	1	1	1	1	1	1		1	1	1	1
	10																																1	1	1		1					1	1	1	1	1	1	1
	11
	12																																1	1	1	1	1		1			1		1	1	1	1	1	1
	13																																		1	1	1	1	1	1		1	1			1
	14																																1	1						1	1		1
	15																															1
	16																																1	1	1	1	1	1	1	1	1	1	1	1
	SUM		0	0	0	0	0	0	0	0	0	0	0	0	0	0	0	0	0	0	0	0	0	0	0	0	0	0	0	0	0	1	8	10	10	7	10	9	8	9	7	9	6	7	4	6	6	5	3
	%		0	0	0	0	0	0	0	0	0	0	0	0	0	0	0	0	0	0	0	0	0	0	0	0	0	0	0	0	0	6.25	50	62.5	62.5	43.75	62.5	56.25	50	56.25	43.75	56.25	37.5	43.75	25	37.5	37.5	31.25	18.75
	#		60E02/CsChrimson hiw#1 before
			1	2	3	4	5	6	7	8	9	10	11	12	13	14	15	16	17	18	19	20	21	22	23	24	25	26	27	28	29	30	31	32	33	34	35	36	37	38	39	40	41	42	43	44	45	46	47
	1																																		1	1	1						1	1
	2																																1	1	1						1	1	1
	3																																	1	1	1	1	1		1	1	1	1
	4																																1
	5																															1	1	1	1	1			1	1		1	1
	6																																1	1		1		1		1	1		1	1
	7																																1	1	1	1	1			1		1	1	1	1
	8																																1	1
	9																															1	1	1	1	1	1	1		1		1
	10																															1	1	1	1		1	1	1	1	1	1
	11																															1	1	1	1	1					1	1
	12																														1	1	1	1	1	1	1	1	1	1
	SUM		0	0	0	0	0	0	0	0	0	0	0	0	0	0	0	0	0	0	0	0	0	0	0	0	0	0	0	0	1	5	10	10	9	8	6	5	3	7	5	7	6	3	1	0	0	0	0
	%		0	0	0	0	0	0	0	0	0	0	0	0	0	0	0	0	0	0	0	0	0	0	0	0	0	0	0	0	8.33333	41.6667	83.3333	83.3333	75	66.6667	50	41.6667	25	58.3333	41.6667	58.3333	50	25	8.33333	0	0	0	0
	#		60E02/CsChrimson hiw#1 7dpi
			1	2	3	4	5	6	7	8	9	10	11	12	13	14	15	16	17	18	19	20	21	22	23	24	25	26	27	28	29	30	31	32	33	34	35	36	37	38	39	40	41	42	43	44	45	46	47
	1																																		1			1	1	1	1
	2
	3																																1	1	1		1			1	1	1
	4																																1	1							1
	5																															1	1	1	1	1	1			1		1
	6																																	1	1	1
	7																																1			1
	8
	9																														1	1	1	1	1	1	1	1	1	1	1
	10																															1	1		1
	11																														1	1	1	1	1	1	1	1	1	1	1	1
	12																														1	1
	SUM		0	0	0	0	0	0	0	0	0	0	0	0	0	0	0	0	0	0	0	0	0	0	0	0	0	0	0	0	3	5	7	6	7	5	4	3	3	5	5	3	0	0	0	0	0	0	0
	%		0	0	0	0	0	0	0	0	0	0	0	0	0	0	0	0	0	0	0	0	0	0	0	0	0	0	0	0	25	41.6667	58.3333	50	58.3333	41.6667	33.3333	25	25	41.6667	41.6667	25	0	0	0	0	0	0	0
	#		60E02/CsChrimson axed before
			1	2	3	4	5	6	7	8	9	10	11	12	13	14	15	16	17	18	19	20	21	22	23	24	25	26	27	28	29	30	31	32	33	34	35	36	37	38	39	40	41	42	43	44	45	46	47
	1																																1	1		1	1			1	1		1	1	1	1
	2																																1	1
	3																																1	1		1					1	1
	4																																	1	1				1	1	1	1		1	1	1	1	1	1
	5																																1	1	1	1	1
	6																															1	1								1		1	1	1	1	1	1
	7																																1	1	1
	8																																1	1	1	1	1			1		1
	9																																	1	1	1		1			1	1
	10																																	1	1	1											1	1	1
	11																																1	1	1		1		1	1	1	1	1	1	1		1	1	1
	12																															1	1	1	1
	13																																	1	1	1	1	1			1
	SUM		0	0	0	0	0	0	0	0	0	0	0	0	0	0	0	0	0	0	0	0	0	0	0	0	0	0	0	0	0	2	9	12	9	7	5	2	2	4	7	5	3	4	4	3	4	4	3
	%		0	0	0	0	0	0	0	0	0	0	0	0	0	0	0	0	0	0	0	0	0	0	0	0	0	0	0	0	0	15.3846	69.2308	92.3077	69.2308	53.8462	38.4615	15.3846	15.3846	30.7692	53.8462	38.4615	23.0769	30.7692	30.7692	23.0769	30.7692	30.7692	23.0769
	#		60E02/CsChrimson axed 7dpi
			1	2	3	4	5	6	7	8	9	10	11	12	13	14	15	16	17	18	19	20	21	22	23	24	25	26	27	28	29	30	31	32	33	34	35	36	37	38	39	40	41	42	43	44	45	46	47
	1
	2
	3
	4
	5																																	1		1		1	1	1	1
	6																																				1
	7
	8																												1
	9																																													1
	10																																											1	1	1	1	1
	11
	12																											1															1	1				1	1
	13																																		1		1	1					1
	SUM		0	0	0	0	0	0	0	0	0	0	0	0	0	0	0	0	0	0	0	0	0	0	0	0	0	1	1	0	0	0	0	1	1	1	2	2	1	1	1	0	2	2	1	2	1	2	1
	%		0	0	0	0	0	0	0	0	0	0	0	0	0	0	0	0	0	0	0	0	0	0	0	0	0	7.69231	7.69231	0	0	0	0	7.69231	7.69231	7.69231	15.3846	15.3846	7.69231	7.69231	7.69231	0	15.3846	15.3846	7.69231	15.3846	7.69231	15.3846	7.69231
[truncated: 86 more columns]
